1 **Plasmid diversity among genetically related *Klebsiella***  
2 ***pneumoniae* *bla*<sub>KPC-2</sub> and *bla*<sub>KPC-3</sub> isolates collected in the Dutch**  
3 **national surveillance**

4  
5  
6 **Antoni P.A. Hendrickx<sup>1\*</sup>, Fabian Landman<sup>1</sup>, Angela de Haan<sup>1</sup>, Dyogo Borst<sup>1</sup>, Sandra Witteveen<sup>1</sup>, Marga**  
7 **van Santen<sup>1</sup>, Han van der Heide<sup>1</sup>, Leo M. Schouls<sup>1</sup> and the Dutch CPE surveillance Study Group<sup>#</sup>.**

8  
9 <sup>1</sup>Center for Infectious Disease Control (CIb), National Institute for Public Health and the Environment  
10 (RIVM), Bilthoven, the Netherlands.

11  
12 \*To whom correspondence should be send. Phone: +31 (0)30 274 3196, E-mail:  
13 antoni.hendrickx@rivm.nl

14 <sup>#</sup>list of participants can be found at the end of this article.

15  
16 Running title: Plasmids of *K. pneumoniae* *bla*<sub>KPC-2</sub> and *bla*<sub>KPC-3</sub>.

17 Keywords: Antibiotic resistance, plasmids, transmission, carbapenemase-producing Enterobacterales,  
18 *bla*<sub>KPC</sub>, Tn4401.

19

20

21 **Abstract**

22 Carbapenemase-producing *Klebsiella pneumoniae* emerged over the past decades as an important  
23 pathogen causing morbidity and mortality in hospitalized patients. For infection prevention and control,  
24 it is important to track the spread of bacterial strains in humans including the plasmids they contain.  
25 However, little is known concerning the plasmid repertoire among *K. pneumoniae* strains. Therefore, the  
26 major aim was to recapitulate the size, contents and diversity of the plasmids of genetically related *K.*  
27 *pneumoniae* strains harboring the beta-lactamase gene *bla*<sub>KPC-2</sub> or *bla*<sub>KPC-3</sub> to determine their  
28 dissemination in the Netherlands and the former Dutch Caribbean islands from 2014-2019. Next-  
29 generation sequencing was combined with long-read third-generation sequencing to reconstruct 18  
30 plasmids of *K. pneumoniae*. wgMLST revealed five genetic clusters (termed KpnClusters) comprised of *K.*  
31 *pneumoniae bla*<sub>KPC-2</sub> isolates and four clusters consisted of *bla*<sub>KPC-3</sub> isolates. Each cluster was  
32 characterized by a distinct resistome and plasmidome. KpnCluster-019 *bla*<sub>KPC-2</sub> isolates were found both  
33 in the Netherlands and the Caribbean islands. *K. pneumoniae bla*<sub>KPC-3</sub> isolates were found in the  
34 collection of the Netherlands. The 18 plasmids were mostly unrelated and varied between *K.*  
35 *pneumoniae bla*<sub>KPC-2</sub> and *bla*<sub>KPC-3</sub> clusters. However, the large and medium sized plasmids contained a  
36 variety of antibiotic resistance genes, transposons, insertion sequence elements, conjugal transfer  
37 systems, cation transport systems, toxin/antitoxin systems, and prophage-related sequence elements.  
38 The small plasmids carried genes implicated in virulence. Thus, implementing long-read plasmid  
39 sequencing analysis for *K. pneumoniae* surveillance provided important insights in the success and  
40 understanding of transmission of a KpnCluster-019 *bla*<sub>KPC-2</sub> strain between the Netherlands and the  
41 Caribbean.

## 42 **Importance**

43 Carbapenemase-producing *Klebsiella pneumoniae* has spread globally and is of great concern for  
44 debilitated patients. *K. pneumoniae* is notorious for spreading antimicrobial resistance genes by  
45 plasmids among *Enterobacterales*. Combining short and long read sequencing enables reconstruction of  
46 plasmids containing antibiotic resistance genes, conjugation machinery, transposons, toxins and/or  
47 virulence determinants and thereby enhancing international pathogen surveillance.

48

## 49 **Introduction**

50 Antimicrobial resistance is spreading rapidly among *Enterobacterales*, including *Klebsiella pneumoniae*,  
51 *Escherichia coli* and *Enterobacter* spp. (1). Within the cell, extra-chromosomal DNA such as plasmids  
52 encode genes that confer resistance to last resort antibiotics, including carbapenems and colistin, and  
53 can transfer between *Enterobacterales* (2). Currently, carbapenemase-producing *Enterobacterales* (CPE)  
54 rank among the most problematic nosocomial pathogens with limited outlook on novel effective  
55 therapeutics (3, 4). With the current increase of multidrug-resistant infections with CPE worldwide, total  
56 healthcare costs are anticipated to increase. *K. pneumoniae* is often referred to as the “canary in the  
57 coalmine”, as new antimicrobial resistance (AMR) genes have been associated with *K. pneumoniae* in  
58 the first clinical reports prior dispersal of the AMR genes among other Gram-negative bacteria (5). Most  
59 newly acquired AMR genes of *K. pneumoniae* are the result of horizontal gene transfer through  
60 conjugative plasmids (6–8). The *K. pneumoniae* carbapenemase KPC encoded by the *bla<sub>KPC</sub>* gene is an  
61 Ambler class A serine carbapenemase, which is often located on a transmissible plasmid-associated  
62 transposon Tn4401, or variants hereof (9–12). Tn4401 consists of flanking imperfect repeat sequences, a  
63 Tn3 transposase gene, a Tn3 resolvase gene and the IS*Kpn6* and IS*Kpn7* insertion sequences (10). The  
64 *bla<sub>KPC-2</sub>* and *bla<sub>KPC-3</sub>* carbapenemases are the most commonly identified variants that have spread

65 globally and provide resistance to penicillins, carbapenems, cephalosporins, cephamycins and  
66 monobactams (13, 14). The KPC-2 and KPC-3 carbapenemases differ in only one amino acid as a histidine  
67 at position 272 is mutated to tyrosine (H272Y) in the KPC-3 variant (15).

68 CPE isolates including *K. pneumoniae* are routinely send to the National Institute for Public  
69 Health and the Environment (RIVM) and are typed by Illumina next-generation sequencing (NGS) in the  
70 Dutch National CPE Surveillance program to identify AMR genes and to determine possible transmission  
71 of strains (16). NGS typically yields short sequence reads of 150 bases, thereby hampering the assembly  
72 of complete chromosomes and plasmids (17). This is often due to large mobile genetic elements, such as  
73 insertion sequence elements, transposons, and other repetitive sequences *e.g.* tandem repeat regions  
74 of >1500 bp in size. However, combining Illumina NGS sequencing with long-read third generation  
75 sequencing (TGS), which produces 1,000 to 500,000 bases or longer sequence reads, can overcome this  
76 problem and enables the reconstruction of chromosomes and complete plasmids (18, 19). Currently, the  
77 transmission of *K. pneumoniae* between persons in different countries and the impact hereof is not  
78 thoroughly understood. It is also not clear whether plasmids of *K. pneumoniae* circulate endemically in  
79 the Netherlands or that are introduced from other high-prevalence countries. While the prevalence of  
80 carbapenemase producing *K. pneumoniae* and associated infections in the Netherlands is relatively low,  
81 the establishment of genomic surveillance of *K. pneumoniae* using TGS is of high importance (20, 21). It  
82 provides for insights in the transmission of specific strains containing plasmids with AMR genes and/or  
83 virulence determinants. We therefore investigated the distribution of *K. pneumoniae* cluster isolates  
84 harboring *bla*<sub>KPC-2</sub> or *bla*<sub>KPC-3</sub> alleles obtained from the Dutch National CPE Surveillance Program and  
85 analyzed the contents of its plasmids using long read third-generation sequencing.

86

## 87 Results

### 88 Distribution and genetic relationship of *bla*<sub>KPC-2</sub> and *bla*<sub>KPC-3</sub> carrying *K. pneumoniae*

89 A collection of 480 carbapenemase-producing *K. pneumoniae* isolates submitted to the Dutch National  
90 CPE Surveillance program from January 1<sup>st</sup> 2014 until June 30<sup>th</sup> 2019 to the National Institute for Public  
91 Health and the Environment (RIVM) were included in this study. The study collection comprised 84 *K.*  
92 *pneumoniae* *bla*<sub>KPC</sub>-positive isolates of which 51 contained the *bla*<sub>KPC-2</sub> allele and 33 harbored the *bla*<sub>KPC-3</sub>  
93 allele (Table 1). Sixty isolates originated from the Netherlands and 24 isolates originated from the  
94 Caribbean. Of the 24 Caribbean isolates, 22 carried the *bla*<sub>KPC-2</sub> allele and only two contained the *bla*<sub>KPC-3</sub>  
95 allele. Whole genome multi-locus sequence typing (wgMLST), using an in-house wgMLST scheme based  
96 on 4,978 genes, of the 480 carbapenemase-producing *K. pneumoniae* isolates collected in the RIVM  
97 revealed that 23 *K. pneumoniae* *bla*<sub>KPC-2</sub> isolates grouped together in five distinct genetic clusters. Fifteen  
98 *K. pneumoniae* *bla*<sub>KPC-3</sub> isolates grouped in four distinct clusters which were obtained from the  
99 Netherlands and 46 isolates were unrelated. The *K. pneumoniae* cluster isolates (termed KpnClusters)  
100 had unique wgMLST cluster types, and were not described previously (Table 1, Fig. 1). KpnCluster-003  
101 and KpnCluster-005 were comprised of five *K. pneumoniae* *bla*<sub>KPC-2</sub> isolates that were exclusively  
102 obtained from the Netherlands, while KpnCluster-021 and KpnCluster-041 contained five isolates from  
103 the Caribbean. The majority ( $n = 10$ ) of the KpnCluster-019 isolates were obtained from the Caribbean.  
104 However, three isolates were from the collection of the Netherlands. One person from whom a  
105 KpnCluster-019 isolate was retrieved in August 2017 in the Netherlands, lived in the Caribbean until June  
106 2017 and migrated to the Netherlands in July, demonstrating intercontinental transmission. No  
107 epidemiological data could be retrieved from the other two Dutch KpnCluster-019 isolates.  
108 Furthermore, most genetic clusters were only distantly related to each other (Fig. 1). The genetic  
109 distance between KpnCluster-019 and KpnCluster-041 was 30 alleles and for KpnCluster-003 and  
110 KpnCluster-005 53 alleles. KpnCluster-008 differed 132 alleles from KpnCluster-005. While the allelic

111 difference between these clusters was low, the other genetic clusters differed 3573 to 3610 alleles from  
112 KpnCluster-005. This confirmed that most clusters were unrelated, and it is in line with the location of  
113 these genetic clusters in the minimum spanning tree.

114

### 115 **The resistome diversity among genetic clusters**

116 Analysis of the NGS-derived resistomes of the cluster and non-cluster isolates showed that *K.*  
117 *pneumoniae* harbored either the *bla*<sub>KPC-2</sub> or the *bla*<sub>KPC-3</sub> allele, none of the isolates carried both alleles  
118 (Fig. 2, Suppl. Fig. 1). Nearly all of the *K. pneumoniae* isolates contained the *fosA*, *oqxA* and *oqxB* genes  
119 conferring resistance to fosfomycin and fluoroquinolone antibiotics, respectively. An unweighted  
120 hierarchical clustering (UPGMA) based on the presence or absence of AMR genes revealed that most  
121 genetic cluster isolates group together per cluster, since the resistomes were more than 85% similar. In  
122 contrast to this, the resistomes of the non-cluster isolates were very diverse and less related since the  
123 resistomes of these isolates were less than 85% similar (Suppl. Fig. 1). Likewise, the resistomes of one  
124 group of *K. pneumoniae* KpnCluster-003 *bla*<sub>KPC-2</sub> and KpnCluster-008 *bla*<sub>KPC-3</sub> cluster isolates with 53 to  
125 132 alleles difference were also unrelated. KpnCluster-019 isolates are unique when compared to the  
126 *bla*<sub>KPC-2</sub> clusters KpnCluster-003, KpnCluster-005, and KpnCluster-021, in that they carried  
127 aminoglycoside (*aac(3)-IIa*), extended spectrum beta-lactams (*bla*<sub>CTX-M-15</sub>, *bla*<sub>SHV-26</sub>),  
128 fluoroquinolone (*qnrB1*) and tetracyclin (*tetA*) antimicrobial resistance (AMR) genes. KpnCluster-019 and  
129 KpnCluster-041 isolates, obtained from the Caribbean, were closely related based on wgMLST, and  
130 group together based on the resistome too. The absence of AMR genes *aph(3'')-Ib*, *aph(6)-Id* and *sul2* in  
131 five of KpnCluster-019 isolates, including the TGS sequenced isolates, indicate the absence of an AMR  
132 gene containing plasmid. In addition, the presence of three KpnCluster-019 isolates from the  
133 Netherlands with varying resistomes within the cluster suggests additional transmissions. KpnCluster-

134 025 *bla*<sub>KPC-3</sub> isolates contained the aminoglycoside (*aac(3)-IIa*) and beta-lactam AMR genes (*bla*SHV-28),  
135 while the other Kpn *bla*<sub>KPC-3</sub> clusters did not. Notably, *mcr* genes conferring resistance to colistin were  
136 not detected in the 84 isolates analyzed. The majority of the *K. pneumoniae bla*<sub>KPC-2</sub> and *bla*<sub>KPC-3</sub> isolates  
137 were resistant to meropenem (47/84; 56%). More specifically, seven of the 23 *K. pneumoniae bla*<sub>KPC-2</sub>  
138 cluster isolates (30%) and 13 of the 15 *bla*<sub>KPC-3</sub> cluster isolates (87%) were resistant to meropenem. The  
139 remainders of the cluster and non-cluster isolates were intermediate resistant or sensitive for  
140 meropenem (Table 1).

141

#### 142 **Antibiotic resistance genes among the genomic elements of the distinct genetic clusters**

143 Long-read sequencing of seven isolates from six of the nine genetic *K. pneumoniae bla*<sub>KPC</sub> clusters,  
144 revealed 18 plasmids with varying sizes (Fig. 3). Plasmids containing either the *bla*<sub>KPC-2</sub> or *bla*<sub>KPC-3</sub> allele  
145 were diverse in size. The large ( $\geq 150$ -250 kb) and medium ( $\geq 50$ -150 kb) sized plasmids contained one or  
146 two replicons from the incompatibility group IncFIB(K) and IncFII(K), IncHI2 and IncHI2a, or IncFIB(pQil)  
147 (Fig. 3). The small plasmids (<50 kb) contained ColRNAI or IncX3/IncL/IncP6 type of replicons. The  
148 chromosomes of the analyzed isolates contained on average five acquired AMR genes, while the  
149 plasmids contained on average nine AMR genes. Fourteen of the 18 plasmids contained AMR genes  
150 from various classes and four plasmids from the isolate of KpnCluster-021 did not. The AMR genes  
151 conferring resistance to phenicol, trimethoprim and macrolide antibiotics were located only on medium  
152 or large sized plasmids. The small plasmids had one or two AMR genes conferring resistance to  
153 aminoglycosides or beta-lactams. Resistance genes for fosfomycin (*fosA*) and fluoroquinolones (*oqxA*  
154 and *oqxB*) were exclusively located on the chromosomes of the seven cluster isolates. KpnCluster-019  
155 and KpnCluster-021 associated with the Caribbean contained plasmids encoding genes for phenicol and  
156 tetracyclin resistance. The KpnCluster-019 and KpnCluster-021 plasmids were not found in non-cluster

157 isolates, whereas the plasmids of the other clusters were detected in a subset non-cluster isolates (Fig.  
158 3). The plasmids of KpnCluster-003 and KpnCluster-005 were present in each of its cluster isolates,  
159 however, in isolates of the other clusters occasionally plasmids were lost, thereby impacting the  
160 composition of the resistome (Fig. 2 and 3).

161 The *bla*<sub>KPC-2</sub> KpnCluster-019 isolates were obtained from both the Caribbean and the  
162 Netherlands, while *bla*<sub>KPC-2</sub> KpnCluster-021 isolates originated only from the Caribbean (Table 1, Fig. 3).  
163 In the KpnCluster-019 isolate RIVM\_C014906, three copies of the *bla*<sub>KPC-2</sub> gene were present, while other  
164 cluster isolates had only one *bla*<sub>KPC</sub> copy. One copy was located in the chromosome, one copy in the 200  
165 kb plasmid pRIVM\_C014906\_1 and a third copy on the 16 kb plasmid pRIVM\_C014906\_3. All these three  
166 *bla*<sub>KPC-2</sub> copies were located on a highly similar *Tn4401a*-derived  $\Delta$ *Tn4401a*-like transposon of 5.6 kb in  
167 this strain. The chromosomes contained this  $\Delta$ *Tn4401a*-like transposon in the exact same region.  
168 KpnCluster-003, KpnCluster-005, KpnCluster-008 and KpnCluster-025 consist of isolates that were  
169 obtained in the Netherlands and in these isolates the *bla*<sub>KPC</sub> allele was located on a *Tn4401a* transposon  
170 of 10 kb.

171

## 172 **Comparison of the *K. pneumoniae* plasmid content**

173 An UPGMA clustering based on the DNA sequence of the 18 plasmids revealed that the majority  
174 of the plasmids were unrelated (Fig. 4). The largest two plasmids pRIVM\_C008981\_1 and  
175 pRIVM\_C014947\_1 carried the largest number of genes and this number decreased by the decreasing  
176 size of the plasmids. Most the plasmid located genes had unknown function. The large and medium  
177 sized plasmids contained the *klcA* gene, encoding an antirestriction protein implicated in the facilitation  
178 of *bla*<sub>KPC</sub> allele transfer (22). None of the plasmids contained known virulence determinants such as  
179 *rmpA*, *rmpA2*, *iroBC*, or *iucABC* implicated in hypervirulence (23, 24). Comparison of the large plasmids



180 revealed that pRIVM\_C008981\_1 and pRIVM\_C015139\_1 from KpnCluster-003 and KpnCluster-005  
181 displayed 90% similarity (Fig. 4). Plasmid pRIVM\_C014947\_1 was not related to any other of the large  
182 plasmids. Despite the low similarity, these large plasmids shared important clusters of genes among  
183 them. They all contained the *silE* and *silP* genes encoding a silver-binding protein and a silver exporting  
184 ATPase, *cusSRCFB* genes implicated in cation efflux, the *copABCD-pcoE* genes involved in copper  
185 resistance and the *arsHACBAD* arsenic resistance gene cluster. These large plasmids also contained  
186 *fecIRABCDE* implicated in Fe(3+)-dicitrate transport, the *traIDSQCVAJM-ylpA* plasmid conjugation gene  
187 cluster, and the *higA-higA1* antitoxins, except pRIVM\_C014947\_1 and pRIVM\_C014947\_2. In addition,  
188 the large plasmids also contained a proportion of plasmid-specific and thus *K. pneumoniae* cluster  
189 specific content (Suppl. Fig. 2).

190 The medium-sized plasmids contained the *virB* virulence regulon transcriptional activator and  
191 the *merAC* mercuric reductase and transport protein. While pRIVM\_C015274\_1 and pRIVM\_C015451\_1  
192 contained a plasmid conjugation gene cluster, pRIVM\_C014906\_2 and pRIVM\_C015139\_2 contained  
193 truncated versions hereof. The more distantly related pRIVM\_C014906\_2 plasmid from KpnCluster-019  
194 had in addition to the *higA-higA1* antitoxins also a *ccdA-ccdB* toxin-antitoxin system. The small plasmids  
195 (<50 kb) contained genes implicated in virulence. Plasmids pRIVM\_C015139\_3 and pRIVM\_C015274\_2  
196 displayed 99% similarity and carried the *virD4-B9-B8-B4-ptIH* Type IV secretion system.  
197 pRIVM\_C014947\_4 contained a *merPT* mercuric transport system, while pRIVM\_C014906\_3 and  
198 pRIVM\_C015274\_3 carried a *ceaC* colicin-E3. The plasmid pRIVM\_C014947\_5 contained the *bdIA* gene  
199 encoding a biofilm dispersion protein.

200

201 **Transposable elements in *K. pneumoniae* plasmids**

202 The large and medium sized plasmids contained the most transposase sequences, and each plasmid had  
203 its unique transposon signature (Fig. 5). The IS1 and IS3 transposase families dominated in the *K.*  
204 *pneumoniae* plasmids. The IS1 family transposase was found most frequently among the plasmids and in  
205 most copies within plasmids. In the large and medium sized plasmids, the *bla*<sub>KPC</sub> allele was located on a  
206 Tn4401a transposon, except in pRIVM\_C014906\_1. In the small plasmids carrying a *bla*<sub>KPC</sub>, the  
207 carbapenemase allele was located on a  $\Delta$ Tn4401a-like transposon. The large plasmids  
208 pRIVM\_C008981\_1, pRIVM\_C015139\_1 and pRIVM\_C014906\_1 harbored 37, 32 and 31 annotated  
209 transposases, respectively. In contrast, the largest plasmid pRIVM\_C014947\_1 of 250.6 kb from  
210 KpnCluster-021 contained only 12 transposons. The remainder of the plasmids from KpnCluster-021 also  
211 contained very few transposase sequences, in contrast to the other plasmids from the different clusters.  
212 The highly related pRIVM\_C015139\_3 and pRIVM\_C015274\_2 plasmids (99% similarity) had identical  
213 transposons. While IS66 and IS110 family transposase sequences also dominate in the large plasmids,  
214 the medium sized plasmids contained IS3 family type of transposases. The medium sized plasmids  
215 contained eleven to 23 transposases, and the small plasmids less than ten.

216

### 217 **Similarity with previously reported plasmids**

218 BLAST analysis of the *K. pneumoniae* plasmids identified in this study showed that 8 of the 18 plasmids  
219 were similar to previously reported plasmids in the NCBI sequence database (Table 2). These plasmids  
220 covered five distinct genetic clusters, except pRIVM\_C008981\_1 from KpnCluster-003. To date, none of  
221 these plasmids were reported to be implicated in healthcare-associated outbreaks. Plasmids  
222 pRIVM\_C008981\_1, pRIVM\_C014906\_1, pRIVM\_C014906\_3 containing *bla*<sub>KPC-2</sub> and pRIVM\_C015274\_1  
223 harboring *bla*<sub>KPC-3</sub> from distinct genetic clusters only had low sequence coverage 35-87% with plasmids  
224 present in the NCBI sequence database. The other *bla*<sub>KPC-2</sub> and *bla*<sub>KPC-3</sub> plasmids had high (93-99%)

225 sequence coverage, indicating that these similar plasmids were detected previously by other  
226 researchers. Plasmids pRIVM\_C014906\_2, pRIVM\_C015139\_1, pRIVM\_C015274\_2 and  
227 pRIVM\_C015274\_3, not carrying a *bla*<sub>KPC</sub> allele, displayed 97-100% sequence coverage and 99-100%  
228 identity to plasmids isolated from *K. pneumoniae* from different countries (Table 2). Plasmids  
229 pRIVM\_C014947\_5 and pRIVM\_C014947\_6 from KpnCluster-021 had 100% sequence coverage with  
230 92.18 to 99.99% identity with plasmids isolated from *Enterobacter hormaechei*. Plasmids similar to  
231 pRIVM\_C014947\_1, pRIVM\_C014947\_3, pRIVM\_C014947\_5 and pRIVM\_C014947\_6 from KpnCluster-  
232 021 were detected previously in a variety of hosts, *e.g.* *Salmonella enterica*, *K. pneumoniae*, and *E.*  
233 *hormaechei*, suggesting these plasmids are broad-host range.

234

### 235 **Prophage sequences in the *K. pneumoniae* cluster genomes**

236 PHASTER analysis revealed that the majority of the large and medium-sized plasmids from different  
237 genetic clusters with IncFIB(K) or IncFIB(pQil) and IncFII(K) replicons contained one to four regions with  
238 prophage-related sequences *e.g.* genes encoding putative phage integrase, phage-like proteins, coat  
239 proteins, and/or tail shaft proteins (Table 3). The size of the prophage sequence regions varied per  
240 plasmid. The most commonly found prophage-related sequence in large and medium-sized plasmids of  
241 cluster isolates was an *Escherichia* phage RCS47 (Table 3). This sequence entails the 14.2 kb *ygbMLKJI-*  
242 *bla*SHV-*recF-lacY* region flanked by IS26 elements and representing 12% of the RCS47 prophage  
243 genome. The small plasmids of <50 kb lacked phage-related sequences. In contrast, the chromosomes of  
244 cluster isolates carried at least three to nine phage sequence regions covering 10-50% of the phage  
245 genome. These phage sequence regions covered a wide variety of distinct phages, including prophage  
246 sequences from *Salmonella*, *Klebsiella*, *Cronobacter*, *Enterobacteria* phages (Suppl. Table 2). The most  
247 commonly found prophage sequence in *Klebsiella* chromosomes was the Enterobacteria phage P4.

## 248 Discussion

249 We showed that a *K. pneumoniae* strain carrying *bla*<sub>KPC-2</sub> was transmitted between the Netherlands and  
250 the Caribbean. This is based on the high genetic relatedness of the 13 isolates from KpnCluster-019 as  
251 assessed by wgMLST and their highly similar resistome and plasmidome. We found that one person lived  
252 in the Caribbean and migrated to the Netherlands. After migration, a KpnCluster-019 isolate was  
253 obtained from this person in a Dutch hospital. Possibly other transmissions by other persons could have  
254 occurred, but these were not confirmed in this study. By combining short-read with long-read  
255 sequencing data, we identified 18 plasmids of seven *K. pneumoniae* isolates from six distinct genetic  
256 clusters found in the Netherlands and the Caribbean and analyzed these plasmids for its AMR gene  
257 profile, *bla*<sub>KPC</sub> transposons, replicons, transposon families, and gene content. The plasmid composition  
258 varied among the genetic clusters. The cluster isolates had unique wgMLST cluster types which were not  
259 published previously and differ from globally circulating extensively drug-resistant (XDR) and highly  
260 virulent (hvKp) *K. pneumoniae* strains (23, 24). KpnCluster-019 is unique compared to the other cluster  
261 isolates analyzed in this study for the following reasons. First, KpnCluster-019 harbors a unique and  
262 extensive set of AMR genes on the chromosome and in its plasmids. Secondly, KpnCluster-019 isolates  
263 were the only to contain three copies of the *bla*<sub>KPC-2</sub> allele, two on two different plasmids and one in the  
264 chromosome. The localization of *bla*<sub>KPC-2</sub> on the chromosome and additional *bla*<sub>KPC-2</sub> copies have been  
265 reported previously and is further complicating the understanding of transmission of multidrug-resistant  
266 *K. pneumoniae* (25, 26). Thirdly, KpnCluster-019 and also KpnCluster-021 isolates from the Caribbean  
267 harbored the *bla*<sub>KPC-2</sub> allele on a 5.6 kb  $\Delta$ Tn4401a-like transposon, while the other isolates from the other  
268 genetic clusters from the Netherlands contained *bla*<sub>KPC</sub> on a 10kb Tn4401a transposon. Most global  
269 descriptions of *K. pneumoniae bla*<sub>KPC</sub> the past decade have been associated with Tn4401a or isoforms  
270 hereof (9). The traditional association of *bla*<sub>KPC</sub> with the Tn4401a transposon has possibly been eroded in  
271 *K. pneumoniae* isolates from the Caribbean to a smaller variant. This is the first report of identification of

272 a 5.6 kb  $\Delta Tn4401a$ -like *bla*<sub>KPC-2</sub> transposon of *K. pneumoniae* in the Netherlands. Preliminary  
273 surveillance data analysis revealed that the  $\Delta Tn4401a$ -like element carrying *bla*<sub>KPC-2</sub> and smaller variants  
274 disseminated among *E. cloacae*, *Serratia marcesens*, *K. oxytoca* and *E. coli* in the Netherlands  
275 (unpublished data). Future work will seek to understand the dissemination of the  $\Delta Tn4401a$ -like *bla*<sub>KPC-2</sub>  
276 element among CPE in the Netherlands. Lastly, the plasmids of KpnCluster-019 isolates contained also  
277 unique plasmid content, including a distinct transposon signature, two toxin-antitoxin systems and a  
278 *ceaC* colicin which possibly contribute to the success in survival, niche adaptation or transmission of this  
279 strain.

280 The *K. pneumoniae* *bla*<sub>KPC-3</sub> isolates had higher MICs for meropenem than the *K. pneumoniae*  
281 *bla*<sub>KPC-2</sub> isolates, which is in line with a previous study (21). The KPC-2 enzyme differs in a single amino  
282 acid substitution (Histidine 272 to Tyrosine) from KPC-3. Additional changes in KPC-3 can lead to  
283 increased resistance for ceftazidime and cephamycin (27). The increase in meropenem resistance  
284 observed in our study is possibly correlated with improved ability of KPC-3 enzymes to hydrolyze the  
285 meropenem antibiotic (15). Alternatively, additional beta-lactamase genes such as *bla*<sub>OXA-1</sub>, *bla*<sub>OXA-9</sub> or  
286 *bla*<sub>TEM-1A</sub> may contribute to increased resistance for meropenem (28).

287 Despite the limited number of long-read sequenced isolates, we have highlighted important  
288 new insights in the genomic surveillance of a notorious multi-antibiotic resistant nosocomial pathogen.  
289 In some clusters, the plasmidome varied as this was likely due to loss of a plasmid. Also, the resistome  
290 data suggest the presence of other plasmids in cluster isolates that were not present in the isolates that  
291 were sequenced using TGS. To overcome this limitation, all isolates used in this study should have been  
292 sequenced using long-read third generation sequencing. Nevertheless, we identified plasmids in *K.*  
293 *pneumoniae* *bla*<sub>KPC-2</sub> and *bla*<sub>KPC-3</sub> cluster isolates which vary in size from large, medium and small. The  
294 large and medium sized plasmids were enriched for a variety of transposons, conjugation transfer

295 systems, cation efflux systems including Fe(3+)-dicitrate transport, and genes encoding for silver, copper  
296 and arsenic resistance. The small plasmids contained putative virulence determinants. The presence of  
297 these systems may contribute to the success of transmission of specific *K. pneumoniae* strains in the  
298 hospital setting or the community (13, 29, 30). Escherichia RCS47 prophage sequences were found on  
299 medium and large plasmids in the cluster isolates analyzed. In contrast, the chromosomes contained a  
300 variety of prophage-related sequences. RCS47 is a P1-like bacteriophage carrying the ESBL-encoding  
301 *blaSHV-2* gene was isolated from a clinical *Escherichia coli* strain (31). The prevalence of P1-like  
302 prophages in animal and human *E. coli* strain collections was 12.6% (31). The presence of P1-like phage  
303 sequences in plasmids of a snapshot of the *K. pneumoniae* population in the Netherlands and the  
304 Caribbean suggest that the role of P1-like phages in disseminating antibiotic resistance may be  
305 underestimated (32).

306 In conclusion, long-read sequencing contributed to the understanding of the successful  
307 transmission of the KpnCluster-019 *K. pneumoniae bla<sub>KPC-2</sub>* strain. Plasmid content such as conjugation  
308 machinery, transposons, virulence determinants and phages may contribute to diversification, and  
309 dissemination of plasmids containing AMR genes, and therefore represent important plasmid features  
310 that warrants future investigation. More long-read plasmid sequencing efforts of CPE and *K.*  
311 *pneumoniae* in particular are required to identify the complete plasmid reservoir involved in the spread  
312 of antibiotic resistance determinants in the Netherlands and the Caribbean islands.

313

314

315

316

317 **Materials and methods**

318

319 **Bacterial isolates.** For the Dutch National carbapenemase-producing Enterobacterales (CPE) Surveillance  
320 program, medical microbiology laboratories from the Netherlands and the Caribbean routinely send CPE  
321 isolates with a meropenem minimum inhibitory concentration (MIC) of  $\geq 0.25$   $\mu\text{g/ml}$  and/or an imipenem  
322 MIC of  $\geq 1$   $\mu\text{g/ml}$  or phenotypic (CIM-test) or genotypical evidence of carbapenemase production to the  
323 National Institute of Public Health and the Environment (RIVM) (16). For this study, 84 carbapenemase-  
324 producing *K. pneumoniae* isolates carrying either the *bla*<sub>KPC-2</sub> allele or the *bla*<sub>KPC-3</sub> allele were included  
325 and collected in the period from January 1<sup>st</sup> 2014 until June 30<sup>th</sup> 2019. Only the first *K. pneumoniae*  
326 isolate per patient in this study period was selected. The 84 isolates were obtained from 84 persons and  
327 from various isolation sites, *i.e.* rectum/perineum ( $n = 43$ ), throat ( $n = 11$ ), pus ( $n = 2$ ), sputum ( $n = 4$ ),  
328 urine ( $n = 10$ ), wound ( $n = 5$ ) and nine were from miscellaneous isolation sites. All bacterial strains were  
329 grown aerobically at 37°C on Columbia sheep blood agar plates.

330

331 **Antimicrobial susceptibility testing.** Resistance to carbapenem was confirmed by assessing the MICs for  
332 meropenem for all the 84 isolates using an Etest (bioMérieux Inc., Marcy l'Etoile, France). Based on the  
333 clinical breakpoints according to EUCAST, the *K. pneumoniae* isolates were classified as sensitive ( $\leq 2$   
334 mg/L), intermediate ( $> 2$  mg/L and  $\leq 8$  mg/L) and resistant ( $> 8$  mg/L) to meropenem. In addition, all  
335 isolates were analyzed for the production of carbapenemase using the carbapenem inactivation method  
336 (CIM) as described previously (33).

337

338 **Next-generation sequencing and wgMLST.** All 84 *K. pneumoniae* isolates were subjected to next-  
339 generation sequencing (NGS) using the Illumina HiSeq 2500 (BaseClear, Leiden, the Netherlands). The  
340 NGS data of the *K. pneumoniae* isolates were used for wgMLST analyses using the in-house wgMLST  
341 scheme in SeqSphere software version 6.0.2 (Ridom GmbH, Münster, Germany). Ridom wgMLST cluster  
342 nomenclature were depicted in Table 1. The resulting data was imported into Bionumerics version 7.6.3  
343 for subsequent comparative analyses (Applied Maths, Sint-Martens-Latem, Belgium). The antibiotic  
344 resistance gene profile and plasmid replicon compositions in all of the isolates were determined by  
345 interrogating the online ResFinder (version 3.1.0) and PlasmidFinder (version 2.0.2) databases available  
346 at the Center for Genomic Epidemiology website (<https://cge.cbs.dtu.dk/services/>) (34, 35). For  
347 ResFinder, a 90% identity threshold and a minimum length of 60% were used as criteria, whereas for  
348 PlasmidFinder, an identity of 95% was utilized.

349  
350 **Long-read third-generation sequencing.** One *K. pneumoniae* isolate per genetic KpnCluster was  
351 sequenced using long-read third-generation Nanopore sequencing (18, 36). High molecular weight DNA  
352 was isolated using an in-house developed protocol. Bacteria were grown overnight in 1.5 ml Brain heart  
353 infusion broth and culture was spun down at 13,000 x *g* for 2 minutes. The pellet was washed and  
354 resuspended in 500 µl of 150 mM NaCl. The suspension was spun down at 5,000 x *g* for 5 minutes and  
355 the pellet was resuspended in 100 µl of QuickExtract™ DNA Extraction Solution (Lucigen) and 0.1 µl  
356 Ready-Lyse™ Lysozyme solution (Epicentre) and incubated for 1 hour at 37°C. Subsequently, 85 µl 10  
357 mM Tris 1 mM EDTA pH = 8 (1x TE), 10 µl proteinase K (>600 mAU/mL, Qiagen) and 5 µl 20% sodium  
358 dodecyl sulfate solution were added, and the mixture was incubated at 56°C for 30 minutes. DNA was  
359 precipitated overnight at -20°C by adding 0.1x volume 3M sodium acetate pH = 5.2 and 2.5x volume ice  
360 cold 100% ethanol. Precipitated DNA was spun down at 13,000 x *g* for 15 minutes and pellets were



361 washed with 1 ml 70% ethanol followed by another centrifugation at 13,000 x *g* for 5 minutes. After  
362 drying, the pellet was dissolved in 200 µl 1x TE and diluted to 1 µg with Nuclease-free water.

363         The Oxford Nanopore protocol SQK-LSK108 (<https://community.nanoporetech.com>) and the  
364 expansion kit for native barcoding EXP-NBD104 was used. Briefly, a shearing step was performed using  
365 g-TUBE's™ (Covaris) to obtain an average DNA fragment size of 8 kb. The DNA was repaired using FFPE  
366 and end-repair kits (New England BioLabs) followed by ligation of barcodes with bead clean up using  
367 AMPure XP (Beckman Coulter) after each step. Barcoded isolates were pooled and sequencing adapters  
368 were added by ligation. The final library was loaded onto a MinION flow cell (MIN-106 R9.4.1). The 48-  
369 hour sequence run was started without live base calling enabled on a MinION device connected to a  
370 desktop computer. After the sequence run, base calling and de-multiplexing was performed using  
371 Albacore 2.3.1 and a single FASTA file per isolate was extracted from the FAST5 files using Poretools  
372 0.5.1 (37). Illumina and Nanopore data were used in a hybrid assembly performed by Unicycler v0.4.4  
373 (38). The resulting contig files were annotated using Prokka and were subsequently loaded into  
374 BioNumerics for further analyses (39).

375

376 **Minimum Spanning Tree and UPGMA analyses.** The BioNumerics software was used to generate a  
377 minimum spanning tree (MST) or an UPGMA hierarchical clustering as described previously (16). The  
378 MST was based on an in-house *K. pneumoniae* wgMLST scheme. The categorical coefficient was used to  
379 calculate the MST. wgMLST clusters were defined as a minimum of two isolates of which the genetic  
380 distance between the two isolates was ≤20 genes. An UPGMA clustering of *K. pneumoniae* *bla*<sub>KPC-2</sub> and  
381 *bla*<sub>KPC-3</sub> isolates was performed based on the presence and/or absence of antibiotic resistance genes per  
382 isolate.

383 **Plasmid reconstruction by read mapping.** The CLC Genomics Workbench version 12.0 software  
384 ([www.qiagenbioinformatics.com](http://www.qiagenbioinformatics.com)) was used to reconstruct plasmids. For this, complete plasmids  
385 obtained by TGS were used as a scaffold to map the trimmed NGS reads of isolates that were from the  
386 same genetic wgMLST cluster. A plasmid was scored “present” in an isolate if reads mapped to a  
387 reference plasmid of interest and  $\geq 85\%$  of the consensus sequence size in kilo bases was reconstructed.  
388 Linear DNA fragments < 5kb were omitted in this study. Nucleotide BLAST analyses on plasmid  
389 sequences were performed using the <https://blast.ncbi.nlm.nih.gov> website and date from October  
390 2019.

391  
392 **Plasmid content analysis.** Bionumerics was used to extract and analyze annotated genes and  
393 transposases in the 18 different plasmids. The data was plotted in Excel. Phaster, the PHAge Search Tool  
394 Enhanced Release website (<http://phaster.ca/>) was used to determine the presence of phage sequences  
395 in the plasmids and searches date from October 2019 (40).

396  
397 **NGS, TGS and plasmid data availability.** The Illumina (NGS), Nanopore (TGS) and plasmid sequence data  
398 sets generated and analyzed in this study are available in NCBI in the European Nucleotide Archive (ENA)  
399 under project number xxx and sequence repositories under Genbank accession numbers xxx. All data  
400 supporting the findings of this study are available in this article and its supplementary information files  
401 are available upon request.

402

403 **Figure legends**

404

405 **Fig. 1. Minimum spanning tree based on wgMLST of 480 sequenced *K. pneumoniae* isolates.** Circles  
406 represent *K. pneumoniae* isolates, and the sizes of the circles indicate the numbers of isolates. Lines  
407 connecting the circles represent the genetic distance in numbers of alleles; the longer the connecting  
408 line, the larger the genetic distance. *K. pneumoniae* *bla*<sub>KPC-2</sub> isolates were marked blue and *K.*  
409 *pneumoniae* *bla*<sub>KPC-3</sub> were marked magenta. *K. pneumoniae* *bla*<sub>KPC-2</sub> or *bla*<sub>KPC-3</sub> cluster isolates that were  
410 sequenced with TGS were marked green. Genetic clusters were indicated with either a blue or a  
411 magenta halo around the circles, if two or more isolates differ  $\leq 20$  alleles. A categorical coefficient was  
412 used for the clustering. Cluster names are indicated. Inset: genetic distance between the KpnClusters in  
413 which the allelic difference is indicated by numbers.

414

415 **Fig. 2. Resistome of *K. pneumoniae* *bla*<sub>KPC-2</sub> and *bla*<sub>KPC-3</sub> cluster isolates.** *K. pneumoniae* *bla*<sub>KPC-2</sub> and  
416 *bla*<sub>KPC-3</sub> cluster isolates were indicated on the y-axis and AMR genes on the x-axis. Antibiotic classes are  
417 indicated above the AMR genes in different colors. The clustering was based on the presence (squares)  
418 and absence of AMR genes. Resistance genes in *K. pneumoniae* *bla*<sub>KPC-2</sub> or *bla*<sub>KPC-3</sub> cluster isolates that  
419 were sequenced with TGS were marked with green squares. Genetic relatedness was depicted in an  
420 UPGMA tree in which *K. pneumoniae* *bla*<sub>KPC-2</sub> isolates were marked with blue branches, and *K.*  
421 *pneumoniae* *bla*<sub>KPC-3</sub> were marked magenta. Dutch KpnCluster-019 isolates were marked with an \*. A  
422 dotted line marks the 85% cut off.

423

424 **Fig. 3. Antimicrobial resistance genes on chromosomes and plasmids.** The presence (black squares) and  
425 absence of AMR genes among the chromosomes and 18 plasmids of seven TGS sequenced isolates

426 (green). Chromosomes (cRIVM\_C0xxxx) and plasmids (pRIVM\_C0xxxx) are depicted on the Y-axis, and  
427 AMR genes on the x-axis. Antibiotic classes are indicated above the AMR genes in different colors.

428

429 **Fig. 4. *K. pneumoniae* plasmid gene content.** An UPGMA clustering was performed based on the  
430 plasmid DNA sequence for the determination of the genetic relation among the 18 plasmids. Similarity is  
431 indicated on the y-axis using a scale from 0 (not similar) to 100% (identical). A similarity of  $\geq 85$  to 100%  
432 is regarded as the same plasmid. The plasmids are indicated on the x-axis. The presence (black squares)  
433 and absence is indicated of annotated genes among the 18 plasmids of seven TGS sequenced isolates. If  
434 a gene was present twice, blue squares were used and more than 2, red squared were used. Colors  
435 indicated different groups of genes with a specific function.

436

437 **Fig. 5. *K. pneumoniae* plasmid-localized transposases.** The presence (black squares) and absence is  
438 indicated of annotated transposases among the 18 plasmids of six TGS sequenced isolates. The plasmids  
439 are indicated on the x-axis. If a transposon was present twice, blue squares were used and more than 2,  
440 red squared were used. The light grey area indicates specific transposons found in only one plasmid.

441

442 **Table 1. Distribution of *K. pneumoniae*  $bla_{KPC-2}$  and  $bla_{KPC-3}$  isolates and resistance to meropenem.**

443 Based on the clinical breakpoints according to EUCAST, the isolates were classified as sensitive (S;  $< 2$   
444 mg/L), intermediate (I;  $\geq 2$  to 8 mg/L) and resistant (R;  $> 8$  mg/L).

445 **Table 2. BLAST similarity analysis of *K. pneumoniae* plasmids.**

446

447 **Table 3. Predicted prophage sequences among *K. pneumoniae* plasmids.**

448

449 **Supplemental Figure 1. Resistome of *K. pneumoniae*  $bla_{KPC-2}$  and  $bla_{KPC-3}$  non-cluster isolates.** *K.*  
450 *pneumoniae*  $bla_{KPC-2}$  isolates were marked blue, and *K. pneumoniae*  $bla_{KPC-3}$  were marked magenta. *K.*  
451 *pneumoniae*  $bla_{KPC-2}$  and  $bla_{KPC-3}$  cluster isolates were indicated on the y-axis and AMR genes on the x-  
452 axis. The UPGMA clustering was based on the presence (black squares) and absence of AMR genes.  
453 Antibiotic classes are indicated above the AMR genes with different colors. A dotted line marks the 85%  
454 cut off.

455

456 **Supplemental Figure 2. *K. pneumoniae* plasmid gene content (continued).** An UPGMA clustering was  
457 performed based on the plasmid DNA sequence for the determination of the genetic relation among the  
458 18 plasmids. Similarity is indicated on the y-axis using a scale from 0 (not similar) to 100% (identical). A  
459 similarity of  $\geq 85$  to 100% is regarded as the same plasmid. The plasmids are indicated on the x-axis. The  
460 presence (black squares) and absence is indicated of annotated genes among the 18 plasmids of six TGS  
461 sequenced isolates. If a gene was present twice, blue squares were used and more than two, red  
462 squared were used. Colors indicated different clusters of genes with a specific function. The light grey  
463 area indicates gene specific content found in only one plasmid.

464

465 **Supplemental table 1. Predicted prophage sequences among *K. pneumoniae* chromosomes.**

466

467

468 **Acknowledgements**

469 We thank all the members of the Dutch CPE surveillance study Group and the Dutch medical  
470 microbiology laboratories for submitting CPE isolates to the RIVM for the national CPE surveillance  
471 program. We thank Dr. Judith W.A. Hoogenboom-Beuving for searching for an epidemiological link of  
472 KpnCluster-019 isolates from the Netherlands with the Caribbean. We also thank Prof. Dr. E. Kuijper, Dr.  
473 M.G. Mennen and Dr. D.W. Notermans for critical reading of this manuscript.

474

475 **Members of the Dutch CPE surveillance Study Group:**

476 T. Halaby, Analytical Diagnostic Center N.V. Curaçao, Willemstad. R. Steingrover, St. Maarten Laboratory  
477 Services, Cay Hill. J.W.T. Cohen Stuart, Noordwest Ziekenhuisgroep, Department of Medical  
478 Microbiology, Alkmaar. D.C. Melles, Meander Medical Center, Department of Medical Microbiology,  
479 Amersfoort. K. van Dijk, Amsterdam UMC, Department of Medical Microbiology and Infection Control,  
480 Amsterdam. I.J.B. Spijkerman, Amsterdam UMC, Academic Medical Center, Department of Medical  
481 Microbiology, Amsterdam. D.W. Notermans, Centre for Infectious Disease Control, National Institute for  
482 Public Health and the Environment, Bilthoven. J.H. Oudbier, Comicro, Hoorn. M.L. van Ogtrop, Onze  
483 Lieve Vrouwe Gasthuis, Department of Medical Microbiology, Amsterdam. A. van Dam, Public Health  
484 Service, Public Health Laboratory, Amsterdam. M. den Reijer, Gelre Hospitals, Department of Medical  
485 Microbiology and Infection prevention, Apeldoorn. J.A.J.W. Kluytmans, Amphia Hospital, Department of  
486 Infection Control, Microvida Laboratory for Microbiology, Breda. M.P.M. van der Linden, IJsselland  
487 hospital, Department of Medical Microbiology, Capelle a/d IJssel. E.E. Mattsson, Reinier de Graaf Groep,  
488 Department of Medical Microbiology, Delft. M. van der Vusse, Deventer Hospital, Department of  
489 Medical Microbiology, Deventer. E. de Jong, Slingeland Hospital, Department of Medical Microbiology,  
490 Doetinchem.

491 Anne Maijer-Reuwer, ADRZ medisch centrum, Department of Medical Microbiology, Goes. , M. van Trijp,  
492 Groene Hart Hospital, Department of Medical Microbiology and Infection Prevention, Gouda. A.J. van  
493 Griethuysen, Gelderse Vallei Hospital, Department of Medical Microbiology, Ede. A. Ott, Certe,  
494 Department of Medical Microbiology, Groningen. E. Bathoorn, University of Groningen, University  
495 Medical Center, Department of Medical Microbiology, Groningen. J.C. Sinnige, Regional Laboratory of  
496 Public Health, Haarlem. E. Heikens, St Jansdal Hospital, Department of Medical Microbiology,  
497 Harderwijk. E.I.G.B. de Brauwer, Zuyderland Medical Centre, Department of Medical Microbiology and  
498 Infection Control, Heerlen. F.S. Stals, Zuyderland Medical Centre, Department of Medical Microbiology  
499 and Infection Control, Heerlen. W. Silvis, LabMicTA, Regional Laboratory of Microbiology Twente  
500 Achterhoek, Hengelo. J.W. Dorigo-Zetsma, CBSL, Tergooi Hospital, Department of Medical Microbiology,  
501 Hilversum. K. Waar, Izore Centre for Infectious Diseases Friesland, Leeuwarden. S.P. van Mens,  
502 Maastricht University Medical Centre, Department of Medical Microbiology, Maastricht. N. Roescher, St  
503 Antonius Hospital, Department of Medical Microbiology and Immunology, Nieuwegein. A. Voss, Canisius  
504 Wilhelmina Hospital, Department of Medical Microbiology and Infectious Diseases, Nijmegen. H.  
505 Wertheim, Radboud University Medical Center, Department of Medical Microbiology, Nijmegen.  
506 B.C.G.C. Slingerland and H.M.E. Frenay, Regional Laboratory Medical Microbiology (RLM), Dordrecht. T.  
507 Schulin, Laurentius Hospital, Department of Medical Microbiology, Roermond. B.M.W. Diederens, Bravis  
508 Hospital, Department of Medical Microbiology, Roosendaal / ZorgSaam Hospital Zeeuws-Vlaanderen,  
509 Department of Medical Microbiology, Terneuzen. L. Bode, Erasmus University Medical Center,  
510 Department of Medical Microbiology, Rotterdam. M. van Rijn, Ikazia Hospital, Department of Medical  
511 Microbiology, Rotterdam. S. Dinant, Maasstad Hospital, Department of Medical Microbiology,  
512 Rotterdam. M. Damen, Maasstad Hospital, Department of Medical Microbiology, Rotterdam. P. de Man,  
513 Sint Franciscus Gasthuis, Department of Medical Microbiology, Rotterdam. M.A. Leversteijn-van Hall,  
514 Alrijne Hospital, Department of Medical Microbiology, Leiden. E.P.M. van Elzakker, Haga Hospital,

515 Department of Medical Microbiology, 's-Gravenhage. A.E. Muller, HMC Westeinde Hospital, Department  
516 of Medical Microbiology, 's-Gravenhage. P. Schneeberger, Jeroen Bosch Hospital, Department of  
517 Medical Microbiology and Infection Control, 's-Hertogenbosch. D.W. van Dam, Zuyderland Medical  
518 Centre, Department of Medical Microbiology and Infection Control, Sittard-Geleen. A.G.M. Buiting,  
519 Elisabeth-TweeSteden (ETZ) Hospital, Department of Medical Microbiology and Immunology, Tilburg.  
520 A.L.M. Vlek, Diaconessenhuis, Department of Medical Microbiology and Immunology, Utrecht. A. Stam,  
521 Saltro Diagnostic Centre, Department of Medical Microbiology, Utrecht. A. Troelstra, University Medical  
522 Center Utrecht, Department of Medical Microbiology, Utrecht. I.T.M.A. Overdeest, PAMM, Department  
523 of Medical Microbiology, Veldhoven. R.W. Bosboom, Rijnstate Hospital, Laboratory for Medical  
524 Microbiology and Immunology, Velp. T.A.M. Trienekens, VieCuri Medical Center, Department of Medical  
525 Microbiology, Venlo. M.J.H.M. Wolfhagen, Isala Hospital, Laboratory of Medical Microbiology and  
526 Infectious Diseases, Zwolle. S. Paltansing, Franciscus Gasthuis & Vlietland, Microbiology and Infection  
527 prevention, Schiedam.

528

529



530 **References**

- 531 1. van Duin D, Doi Y. 2017. The global epidemiology of carbapenemase-producing *Enterobacteriaceae*.  
532 *Virulence* 8:460–469.
- 533 2. Kopotsa K, Osei Sekyere J, Mbelle NM. 2019. Plasmid evolution in carbapenemase-producing  
534 *Enterobacteriaceae*: a review. *Ann N Y Acad Sci*.
- 535 3. Bonomo RA, Burd EM, Conly J, Limbago BM, Poirel L, Segre JA, Westblade LF. 2018. Carbapenemase-  
536 Producing Organisms: A Global Scourge. *Clin Infect Dis Off Publ Infect Dis Soc Am* 66:1290–1297.
- 537 4. Trecarichi EM, Tumbarello M. 2017. Therapeutic options for carbapenem-resistant  
538 *Enterobacteriaceae* infections. *Virulence* 8:470–484.
- 539 5. Wyres KL, Holt KE. 2018. *Klebsiella pneumoniae* as a key trafficker of drug resistance genes from  
540 environmental to clinically important bacteria. *Curr Opin Microbiol* 45:131–139.
- 541 6. Navon-Venezia S, Kondratyeva K, Carattoli A. 2017. *Klebsiella pneumoniae*: a major worldwide  
542 source and shuttle for antibiotic resistance. *FEMS Microbiol Rev* 41:252–275.
- 543 7. Wyres KL, Holt KE. 2016. *Klebsiella pneumoniae* Population Genomics and Antimicrobial-Resistant  
544 Clones. *Trends Microbiol* 24:944–956.
- 545 8. Rozwandowicz M, Brouwer MSM, Fischer J, Wagenaar JA, Gonzalez-Zorn B, Guerra B, Mevius DJ,  
546 Hordijk J. 2018. Plasmids carrying antimicrobial resistance genes in *Enterobacteriaceae*. *J Antimicrob*  
547 *Chemother* 73:1121–1137.
- 548 9. Cuzon G, Naas T, Nordmann P. 2011. Functional characterization of *Tn4401*, a *Tn3*-based transposon  
549 involved in *bla*KPC gene mobilization. *Antimicrob Agents Chemother* 55:5370–5373.

- 550 10. Naas T, Cuzon G, Villegas M-V, Lartigue M-F, Quinn JP, Nordmann P. 2008. Genetic structures at the  
551 origin of acquisition of the beta-lactamase *bla* KPC gene. *Antimicrob Agents Chemother* 52:1257–  
552 1263.
- 553 11. Munoz-Price LS, Poirel L, Bonomo RA, Schwaber MJ, Daikos GL, Cormican M, Cornaglia G, Garau J,  
554 Gniadkowski M, Hayden MK, Kumarasamy K, Livermore DM, Maya JJ, Nordmann P, Patel JB,  
555 Paterson DL, Pitout J, Villegas MV, Wang H, Woodford N, Quinn JP. 2013. Clinical epidemiology of  
556 the global expansion of *Klebsiella pneumoniae* carbapenemases. *Lancet Infect Dis* 13:785–796.
- 557 12. Ambler RP, Coulson AF, Frère JM, Ghuysen JM, Joris B, Forsman M, Levesque RC, Tiraby G, Waley  
558 SG. 1991. A standard numbering scheme for the class A beta-lactamases. *Biochem J* 276 ( Pt 1):269–  
559 270.
- 560 13. Mathers AJ, Peirano G, Pitout JDD. 2015. The role of epidemic resistance plasmids and international  
561 high-risk clones in the spread of multidrug-resistant *Enterobacteriaceae*. *Clin Microbiol Rev* 28:565–  
562 591.
- 563 14. Walther-Rasmussen J, Høiby N. 2007. Class A carbapenemases. *J Antimicrob Chemother* 60:470–  
564 482.
- 565 15. Alba J, Ishii Y, Thomson K, Moland ES, Yamaguchi K. 2005. Kinetics study of KPC-3, a plasmid-  
566 encoded class A carbapenem-hydrolyzing beta-lactamase. *Antimicrob Agents Chemother* 49:4760–  
567 4762.
- 568 16. Bosch T, Lutgens SPM, Hermans MHA, Wever PC, Schneeberger PM, Renders NHM, Leenders ACAP,  
569 Kluytmans JAJW, Schoffelen A, Notermans D, Witteveen S, Bathoorn E, Schouls LM. 2017. Outbreak  
570 of NDM-1-Producing *Klebsiella pneumoniae* in a Dutch Hospital, with Interspecies Transfer of the

- 571 Resistance Plasmid and Unexpected Occurrence in Unrelated Health Care Centers. *J Clin Microbiol*  
572 55:2380–2390.
- 573 17. Boolchandani M, D’Souza AW, Dantas G. 2019. Sequencing-based methods and resources to study  
574 antimicrobial resistance. *Nat Rev Genet* 20:356–370.
- 575 18. Lu H, Giordano F, Ning Z. 2016. Oxford Nanopore MinION Sequencing and Genome Assembly.  
576 *Genomics Proteomics Bioinformatics* 14:265–279.
- 577 19. de Lannoy C, de Ridder D, Risse J. 2017. The long reads ahead: *de novo* genome assembly using the  
578 MinION. *F1000Research* 6:1083.
- 579 20. European Centre for Disease Prevention and Control. 2013. Carbapenemase-producing bacteria in  
580 Europe: interim results from the European Survey on carbapenemase-producing *Enterobacteriaceae*  
581 (EuSCAPE) project. European Centre for Disease Prevention and Control, Stockholm, Sweden.
- 582 21. van der Zwaluw K, Witteveen S, Wielders L, van Santen M, Landman F, de Haan A, Schouls LM,  
583 Bosch T. 2019. Molecular characteristics of Carbapenemase-producing *Enterobacterales* in the  
584 Netherlands; results of the 2014-2018 national laboratory surveillance. Provisionally accepted.
- 585 22. Liang W, Tang Y, Li G, Shen P, Tian Y, Jiang H, Jiang X, Lu Y. 2019. KlcAHS genes are ubiquitous in  
586 clinical, *bla*KPC-2-positive, *Klebsiella pneumoniae* isolates. *Infect Genet Evol J Mol Epidemiol Evol*  
587 *Genet Infect Dis* 70:84–89.
- 588 23. Holt KE, Wertheim H, Zadoks RN, Baker S, Whitehouse CA, Dance D, Jenney A, Connor TR, Hsu LY,  
589 Severin J, Brisse S, Cao H, Wilksch J, Gorrie C, Schultz MB, Edwards DJ, Nguyen KV, Nguyen TV, Dao  
590 TT, Mensink M, Minh VL, Nhu NTK, Schultsz C, Kuntaman K, Newton PN, Moore CE, Strugnell RA,  
591 Thomson NR. 2015. Genomic analysis of diversity, population structure, virulence, and antimicrobial

- 592 resistance in *Klebsiella pneumoniae*, an urgent threat to public health. Proc Natl Acad Sci U S A  
593 112:E3574-3581.
- 594 24. Russo TA, Marr CM. 2019. Hypervirulent *Klebsiella pneumoniae*. Clin Microbiol Rev 32.
- 595 25. Huang W, Wang G, Sebra R, Zhuge J, Yin C, Agüero-Rosenfeld ME, Schuetz AN, Dimitrova N, Fallon  
596 JT. 2017. Emergence and Evolution of Multidrug-Resistant *Klebsiella pneumoniae* with both *bla*KPC  
597 and *bla*CTX-M Integrated in the Chromosome. Antimicrob Agents Chemother 61.
- 598 26. Feng Y, Liu L, McNally A, Zong Z. 2019. Coexistence of three *bla*KPC-2 genes on an IncF/IncR plasmid  
599 in ST11 *Klebsiella pneumoniae*. J Glob Antimicrob Resist 17:90–93.
- 600 27. Haidar G, Clancy CJ, Shields RK, Hao B, Cheng S, Nguyen MH. 2017. Mutations in *bla*KPC-3 That  
601 Confer Ceftazidime-Avibactam Resistance Encode Novel KPC-3 Variants That Function as Extended-  
602 Spectrum  $\beta$ -Lactamases. Antimicrob Agents Chemother 61.
- 603 28. Curiao T, Morosini MI, Ruiz-Garbajosa P, Robustillo A, Baquero F, Coque TM, Cantón R. 2010.  
604 Emergence of *bla* KPC-3-*Tn*4401a associated with a pKPN3/4-like plasmid within ST384 and ST388  
605 *Klebsiella pneumoniae* clones in Spain. J Antimicrob Chemother 65:1608–1614.
- 606 29. Wyres KL, Wick RR, Judd LM, Froumine R, Tokolyi A, Gorrie CL, Lam MMC, Duchêne S, Jenney A, Holt  
607 KE. 2019. Distinct evolutionary dynamics of horizontal gene transfer in drug resistant and virulent  
608 clones of *Klebsiella pneumoniae*. PLoS Genet 15:e1008114.
- 609 30. Hanczvikkel A, Füzi M, Ungvári E, Tóth Á. 2018. Transmissible silver resistance readily evolves in  
610 high-risk clone isolates of *Klebsiella pneumoniae*. Acta Microbiol Immunol Hung 65:387–403.
- 611 31. Billard-Pomares T, Fouteau S, Jacquet ME, Roche D, Barbe V, Castellanos M, Bouet JY, Cruveiller S,  
612 Médigue C, Blanco J, Clermont O, Denamur E, Branger C. 2014. Characterization of a P1-like

- 613 bacteriophage carrying an SHV-2 extended-spectrum  $\beta$ -lactamase from an *Escherichia coli* strain.  
614 Antimicrob Agents Chemother 58:6550–6557.
- 615 32. Venturini C, Zingali T, Wyrsh ER, Bowring B, Iredell J, Partridge SR, Djordjevic SP. 2019. Diversity of  
616 P1 phage-like elements in multidrug resistant *Escherichia coli*. Sci Rep 9:18861.
- 617 33. van der Zwaluw K, de Haan A, Pluister GN, Bootsma HJ, de Neeling AJ, Schouls LM. 2015. The  
618 carbapenem inactivation method (CIM), a simple and low-cost alternative for the Carba NP test to  
619 assess phenotypic carbapenemase activity in gram-negative rods. PloS One 10:e0123690.
- 620 34. Carattoli A, Zankari E, García-Fernández A, Voldby Larsen M, Lund O, Villa L, Møller Aarestrup F,  
621 Hasman H. 2014. *In silico* detection and typing of plasmids using PlasmidFinder and plasmid  
622 multilocus sequence typing. Antimicrob Agents Chemother 58:3895–3903.
- 623 35. Zankari E, Hasman H, Cosentino S, Vestergaard M, Rasmussen S, Lund O, Aarestrup FM, Larsen MV.  
624 2012. Identification of acquired antimicrobial resistance genes. J Antimicrob Chemother 67:2640–  
625 2644.
- 626 36. Loose M, Malla S, Stout M. 2016. Real-time selective sequencing using nanopore technology. Nat  
627 Methods 13:751–754.
- 628 37. Loman NJ, Quinlan AR. 2014. Poretools: a toolkit for analyzing nanopore sequence data. Bioinforma  
629 Oxf Engl 30:3399–3401.
- 630 38. Wick RR, Judd LM, Gorrie CL, Holt KE. 2017. Unicycler: Resolving bacterial genome assemblies from  
631 short and long sequencing reads. PLoS Comput Biol 13:e1005595.
- 632 39. Seemann T. 2014. Prokka: rapid prokaryotic genome annotation. Bioinforma Oxf Engl 30:2068–  
633 2069.

634 40. Arndt D, Grant JR, Marcu A, Sajed T, Pon A, Liang Y, Wishart DS. 2016. PHASTER: a better, faster  
635 version of the PHAST phage search tool. *Nucleic Acids Res* 44:W16-21.

636

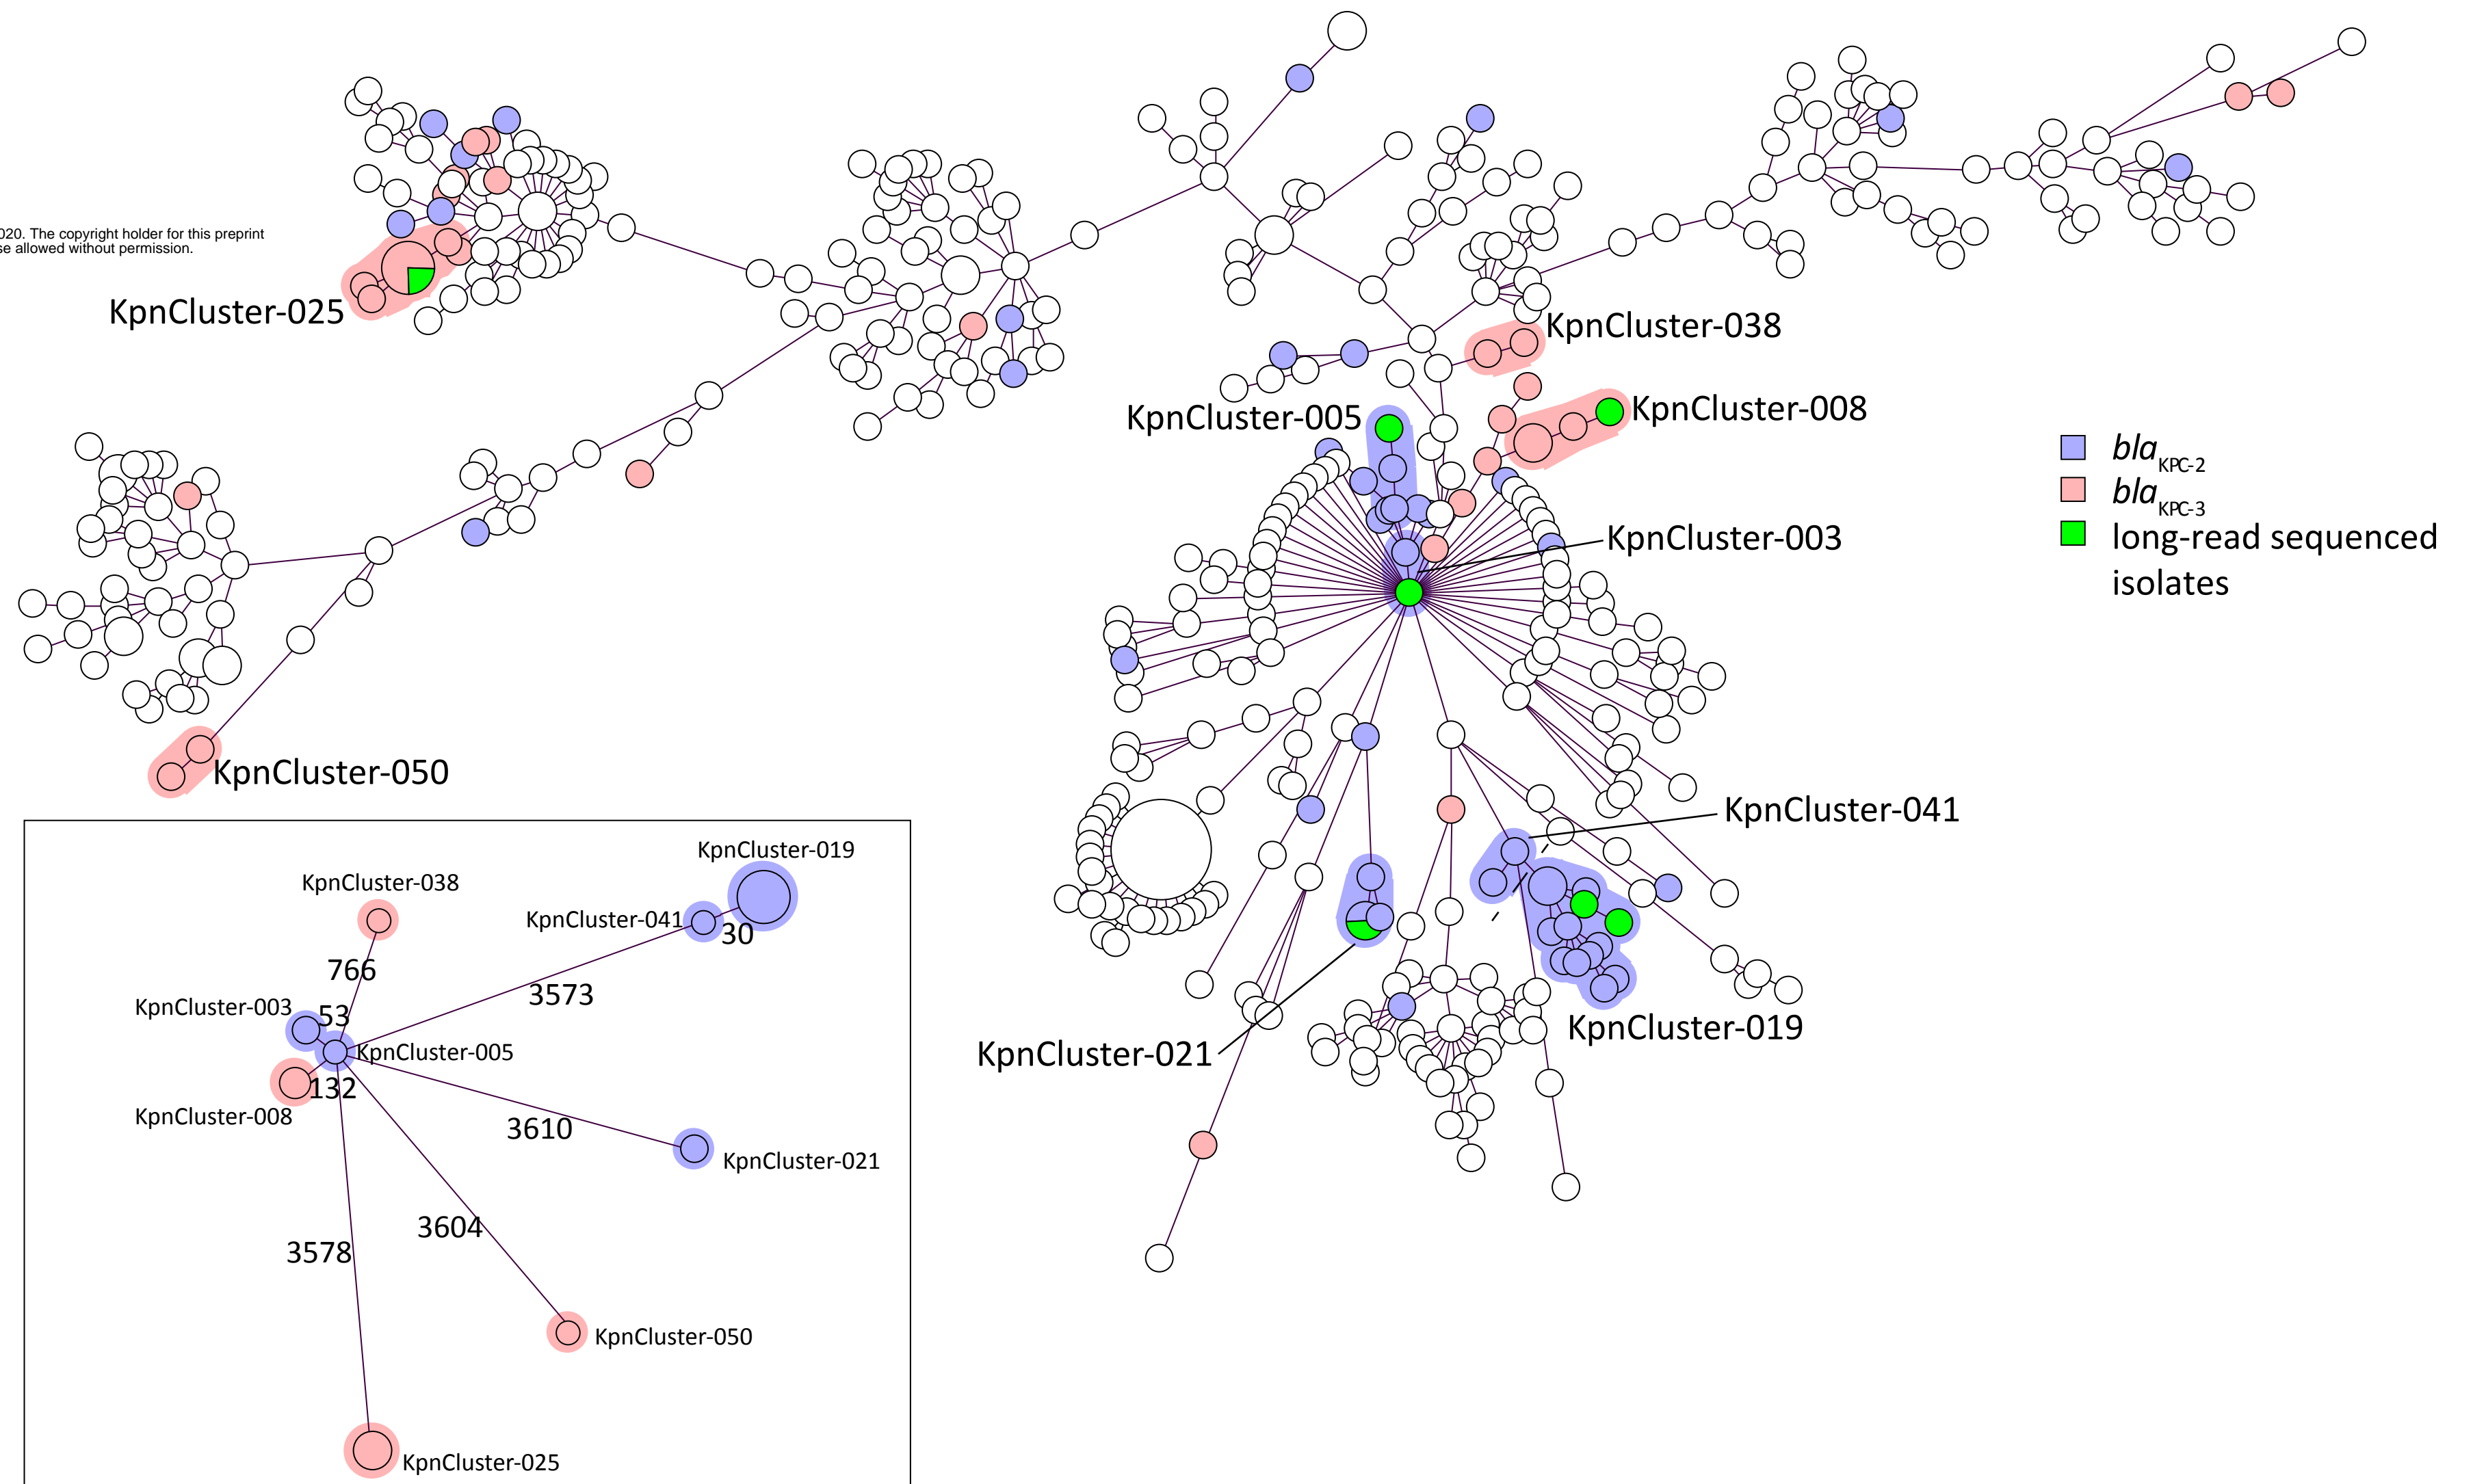

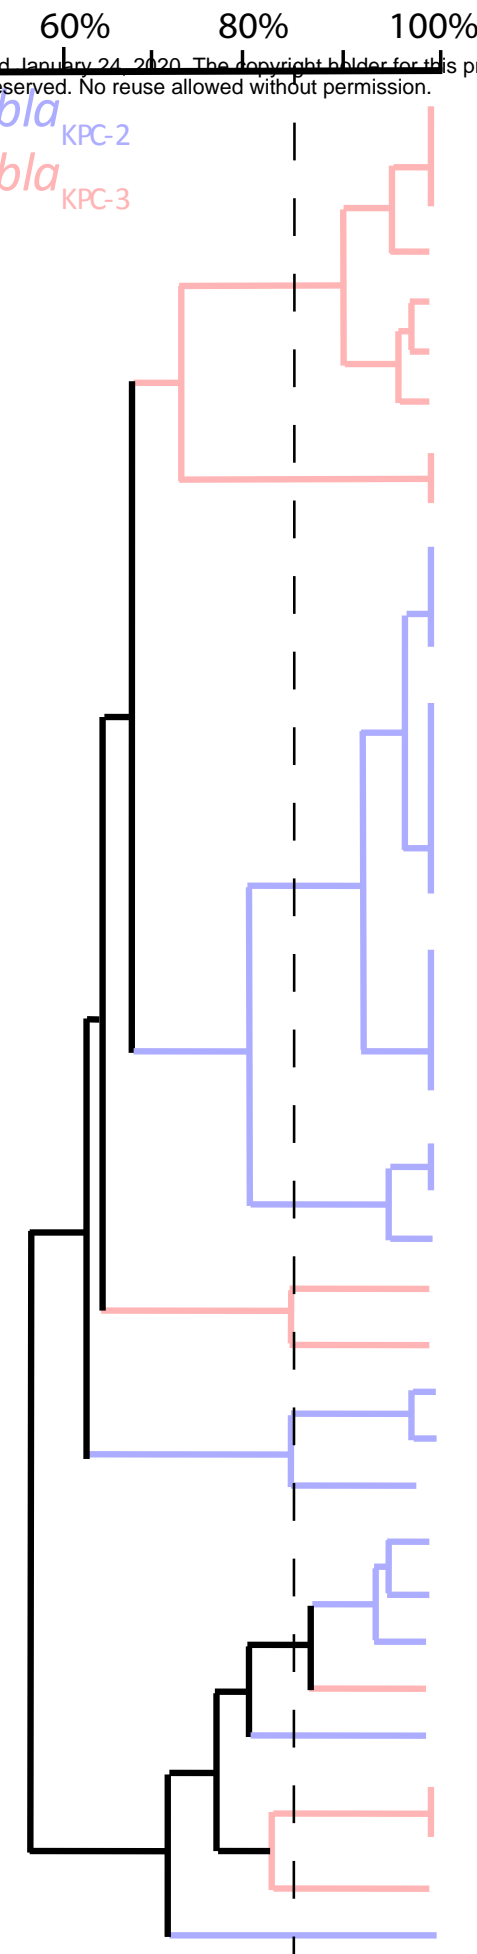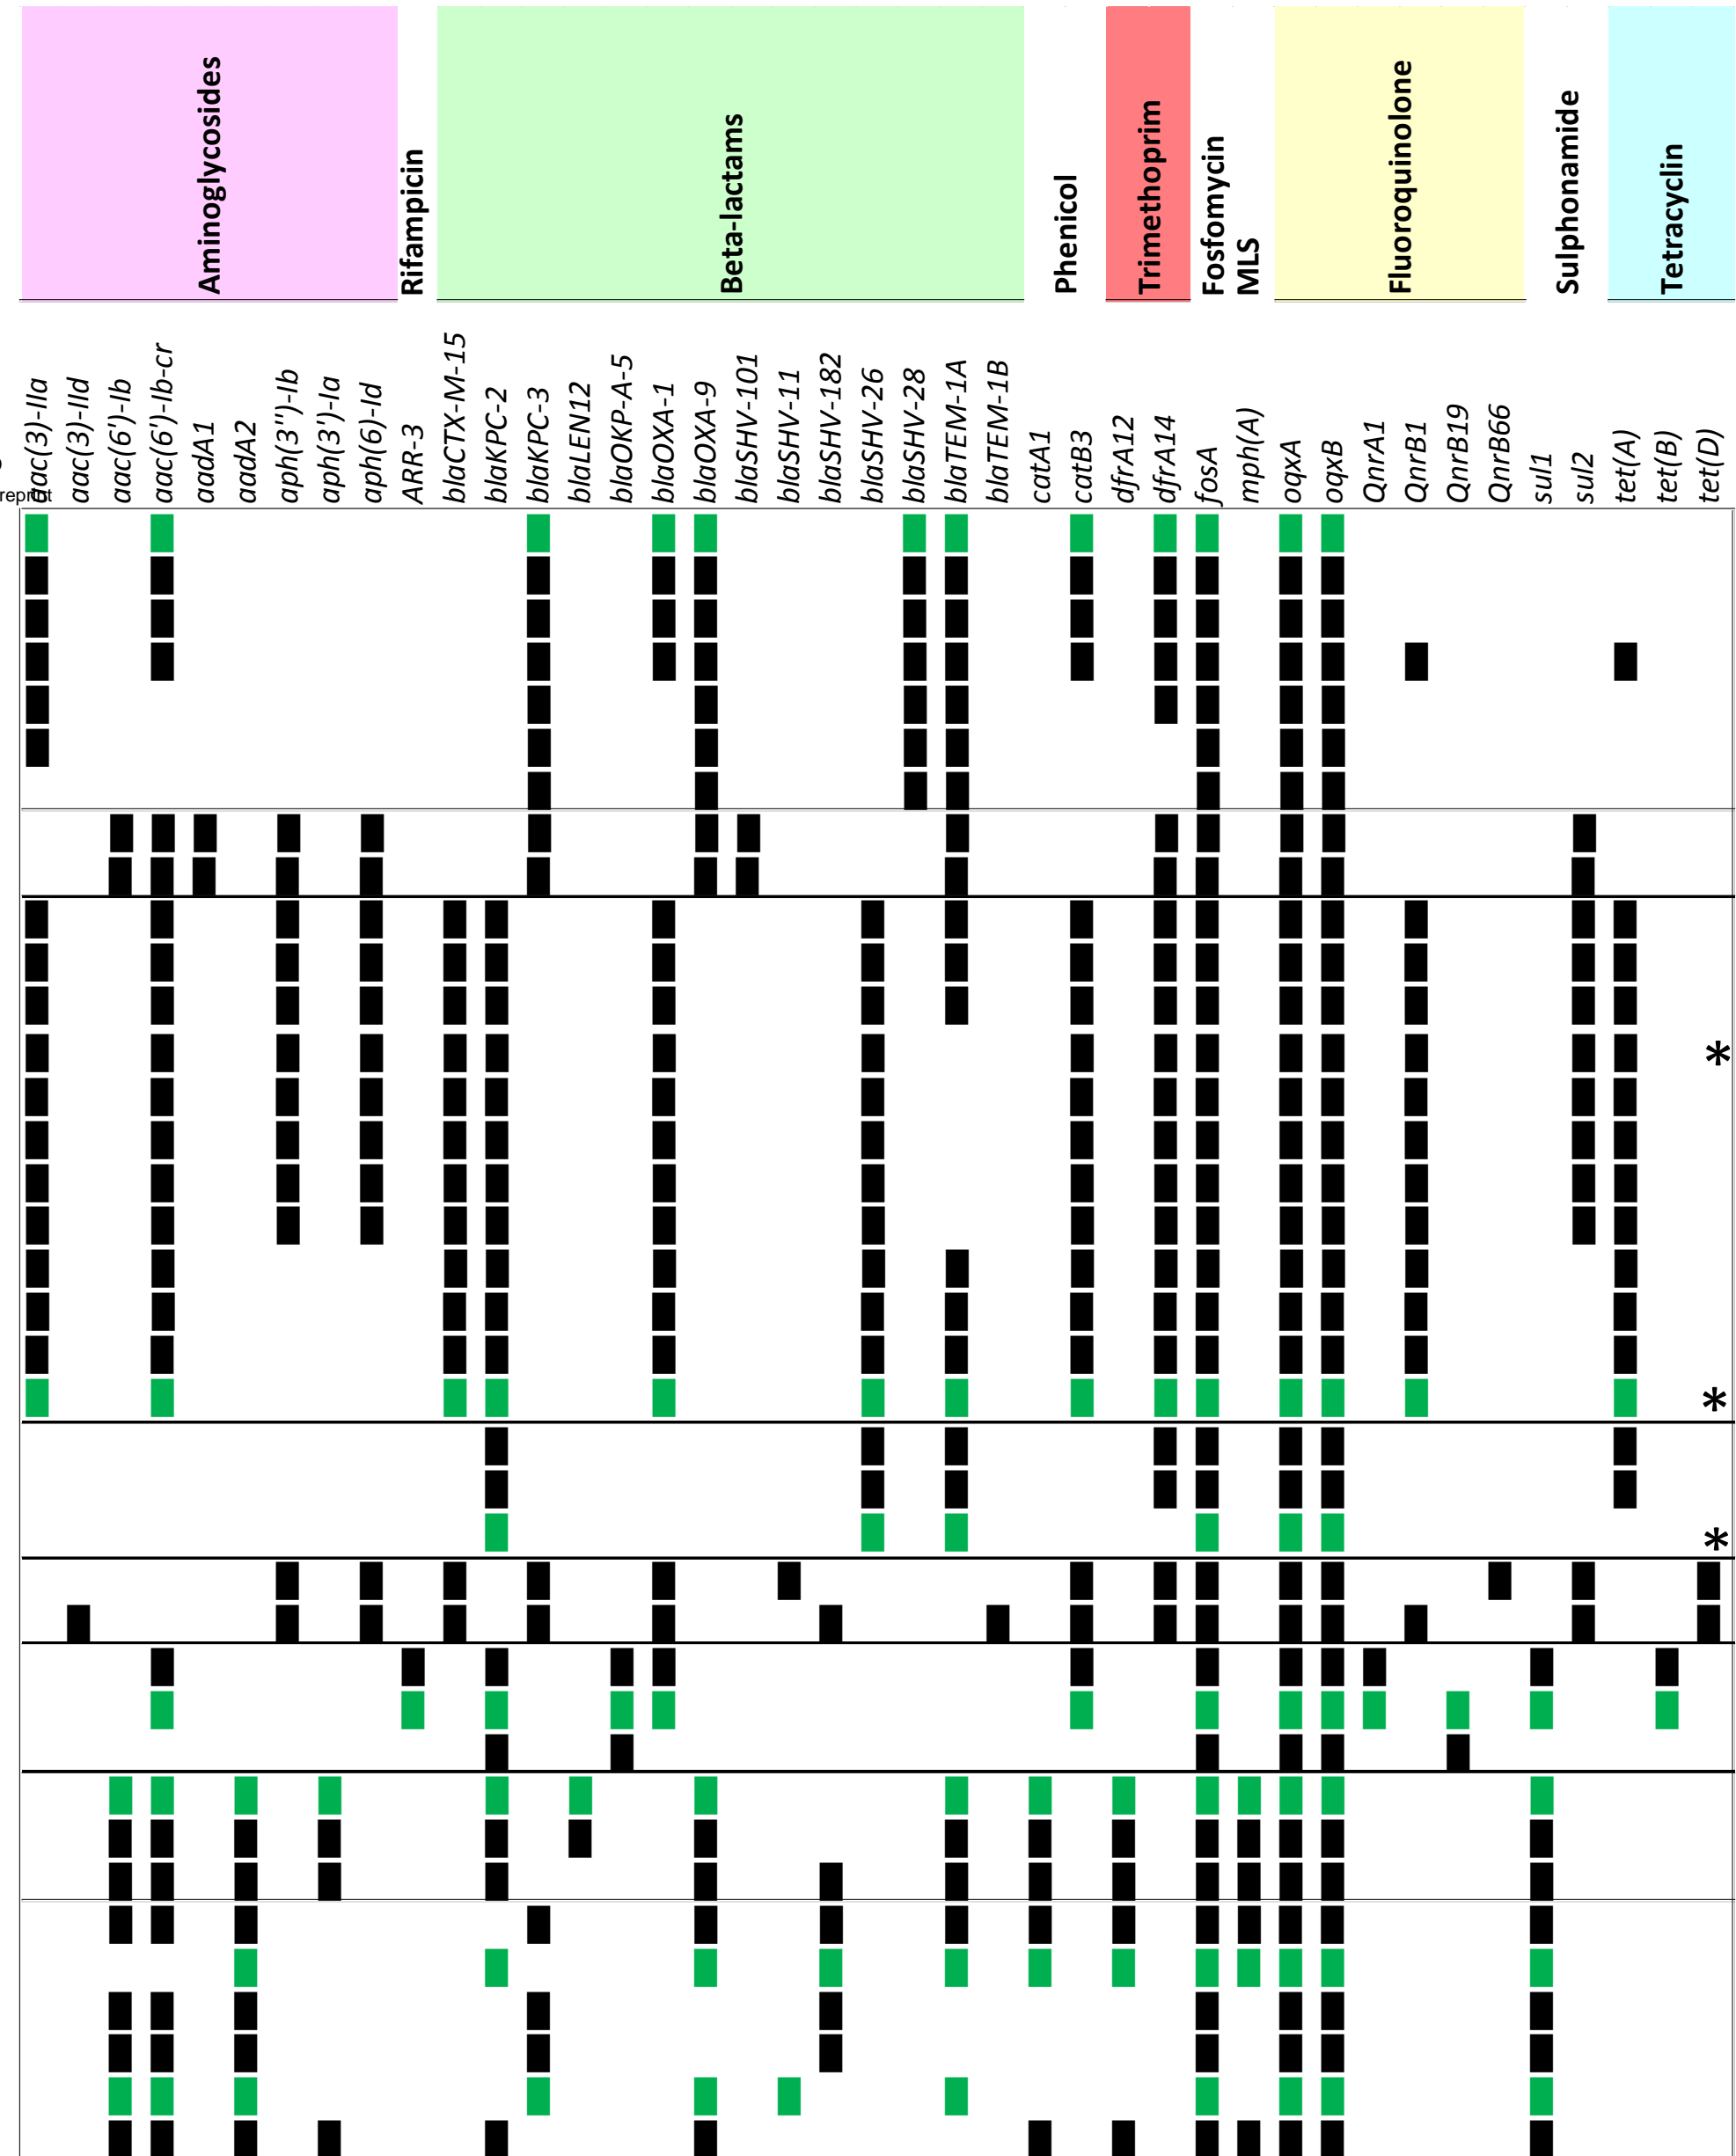

KpnCluster  
KpnCluster-025  
KpnCluster-050  
KpnCluster-019  
\*  
\*  
\*  
KpnCluster-041  
KpnCluster-041  
\*  
KpnCluster-019  
KpnCluster-038  
KpnCluster-021  
KpnCluster-005  
KpnCluster-008  
KpnCluster-003  
KpnCluster-008  
KpnCluster-008  
KpnCluster-008  
KpnCluster-003





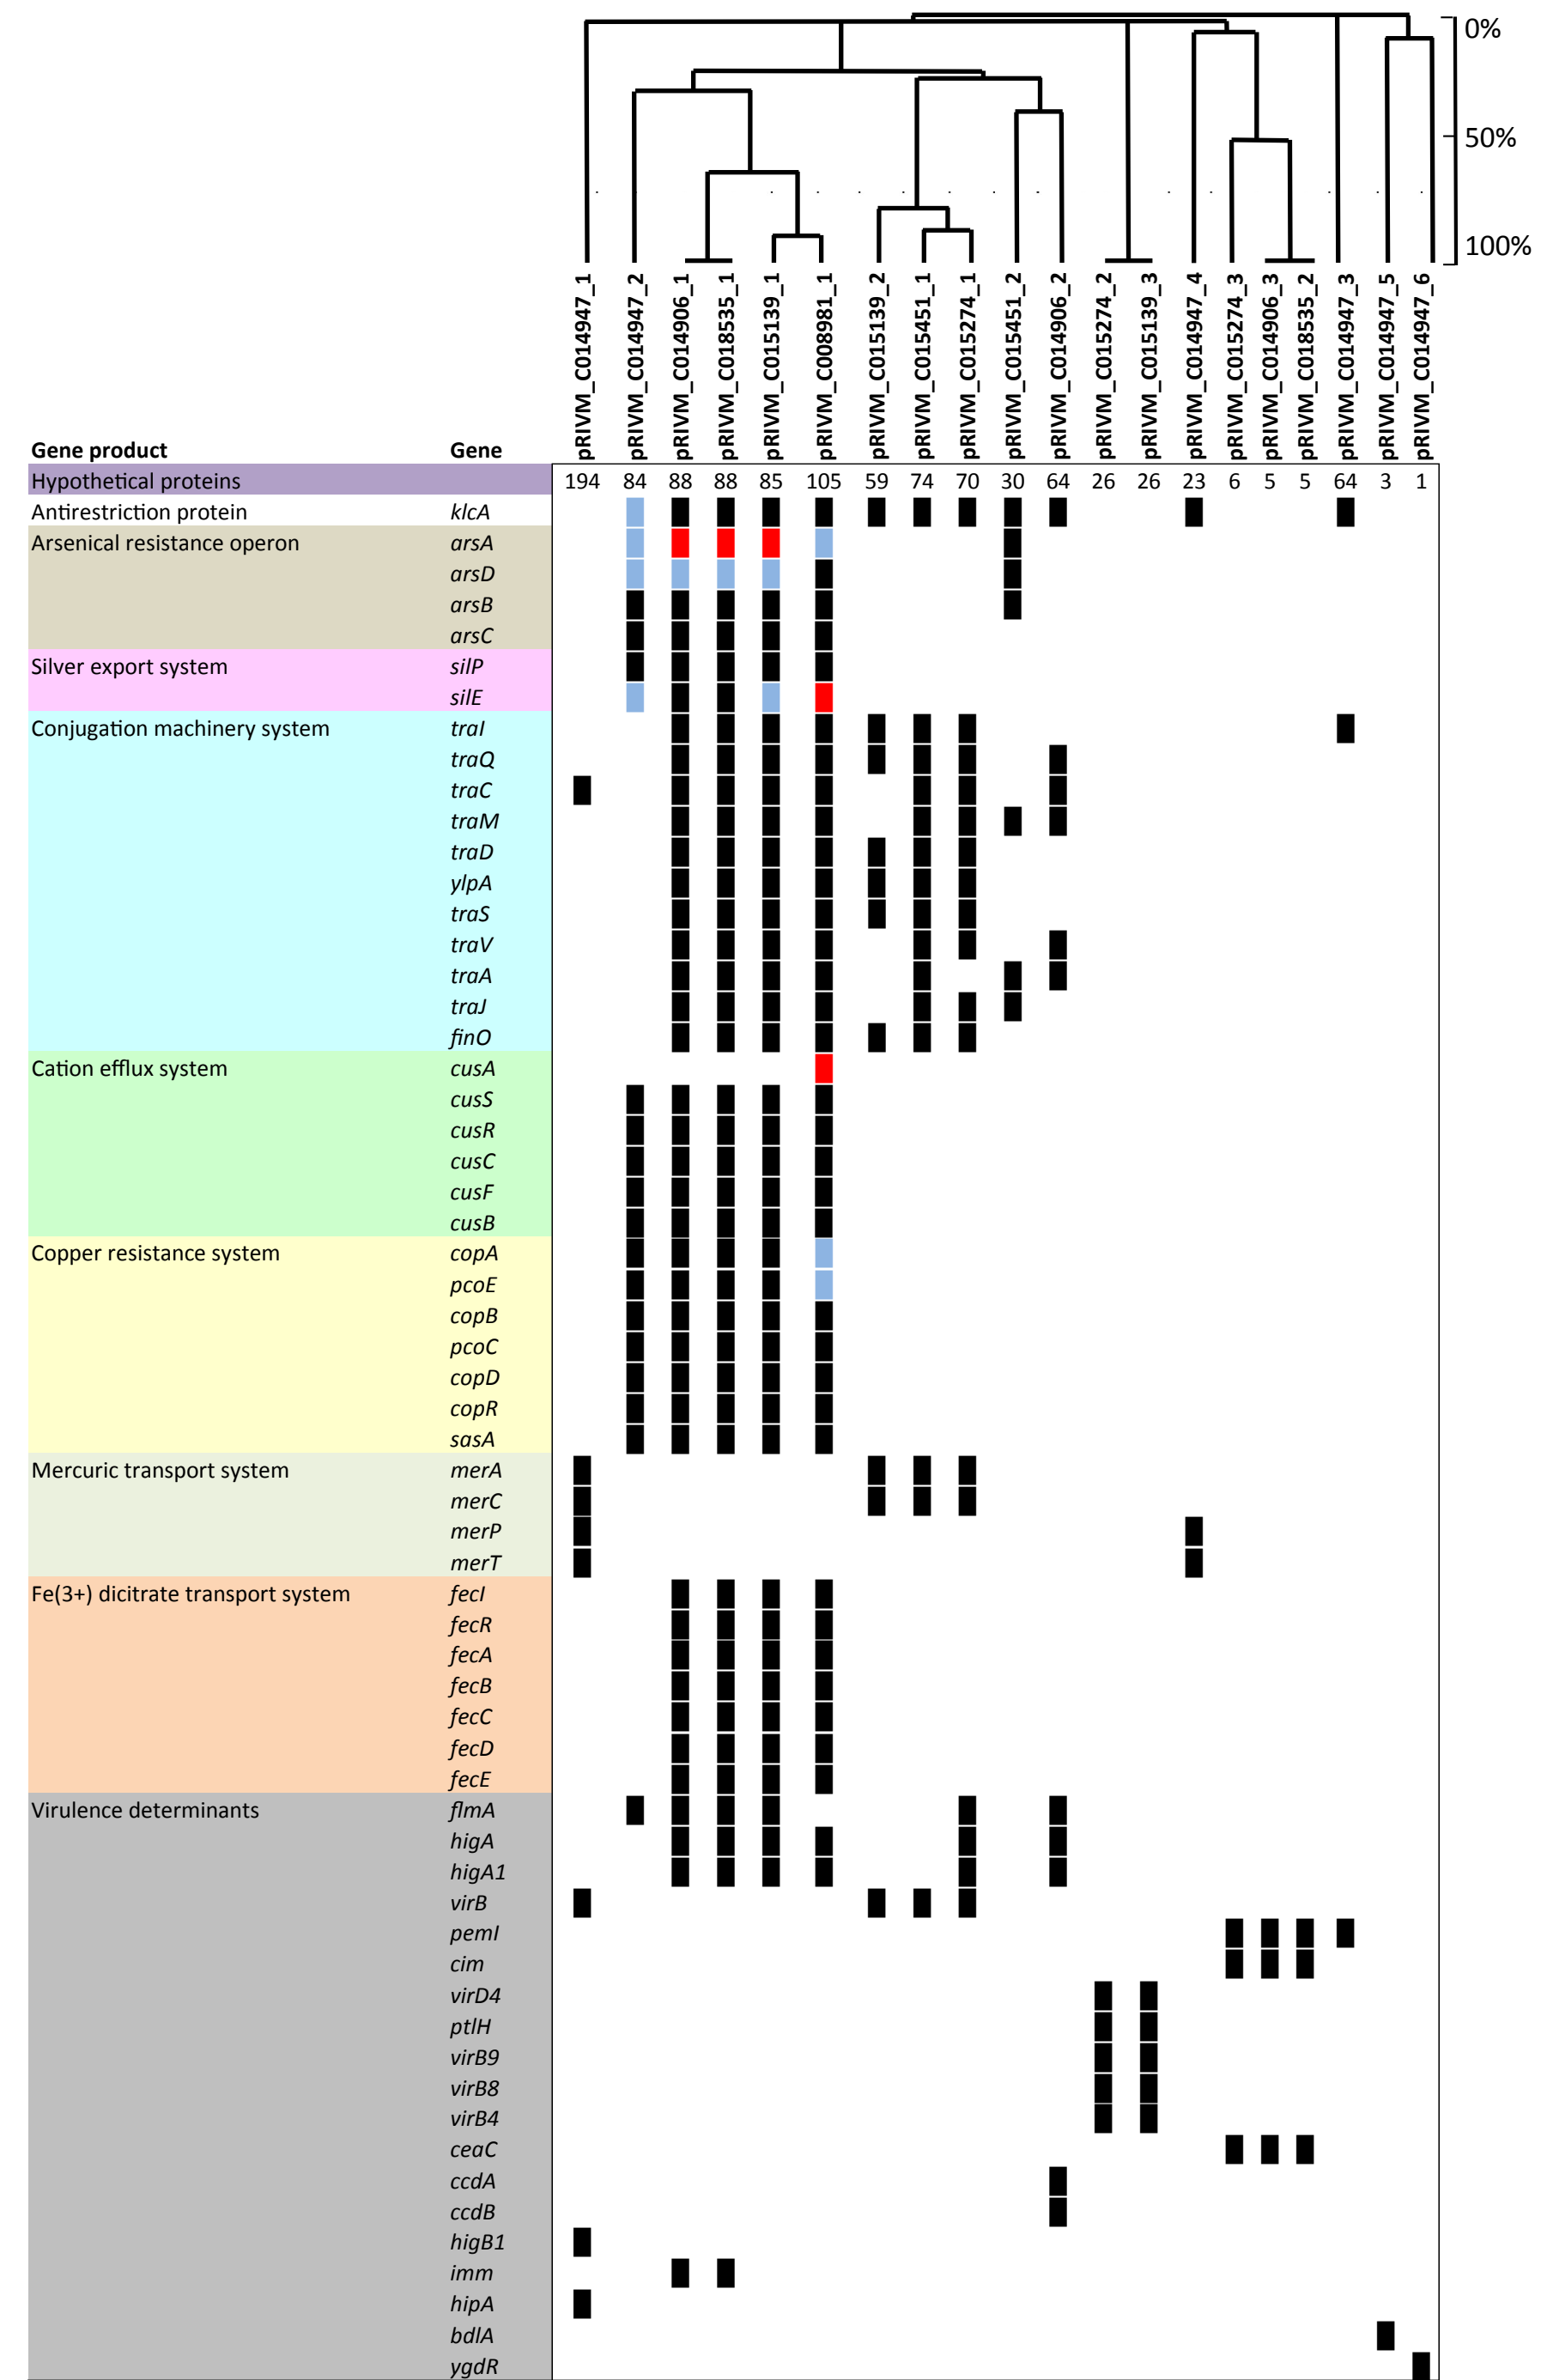

*bla* KPC-2  
*bla* KPC-3  
 $\Delta$ Tn4401a-like  
Tn4401a

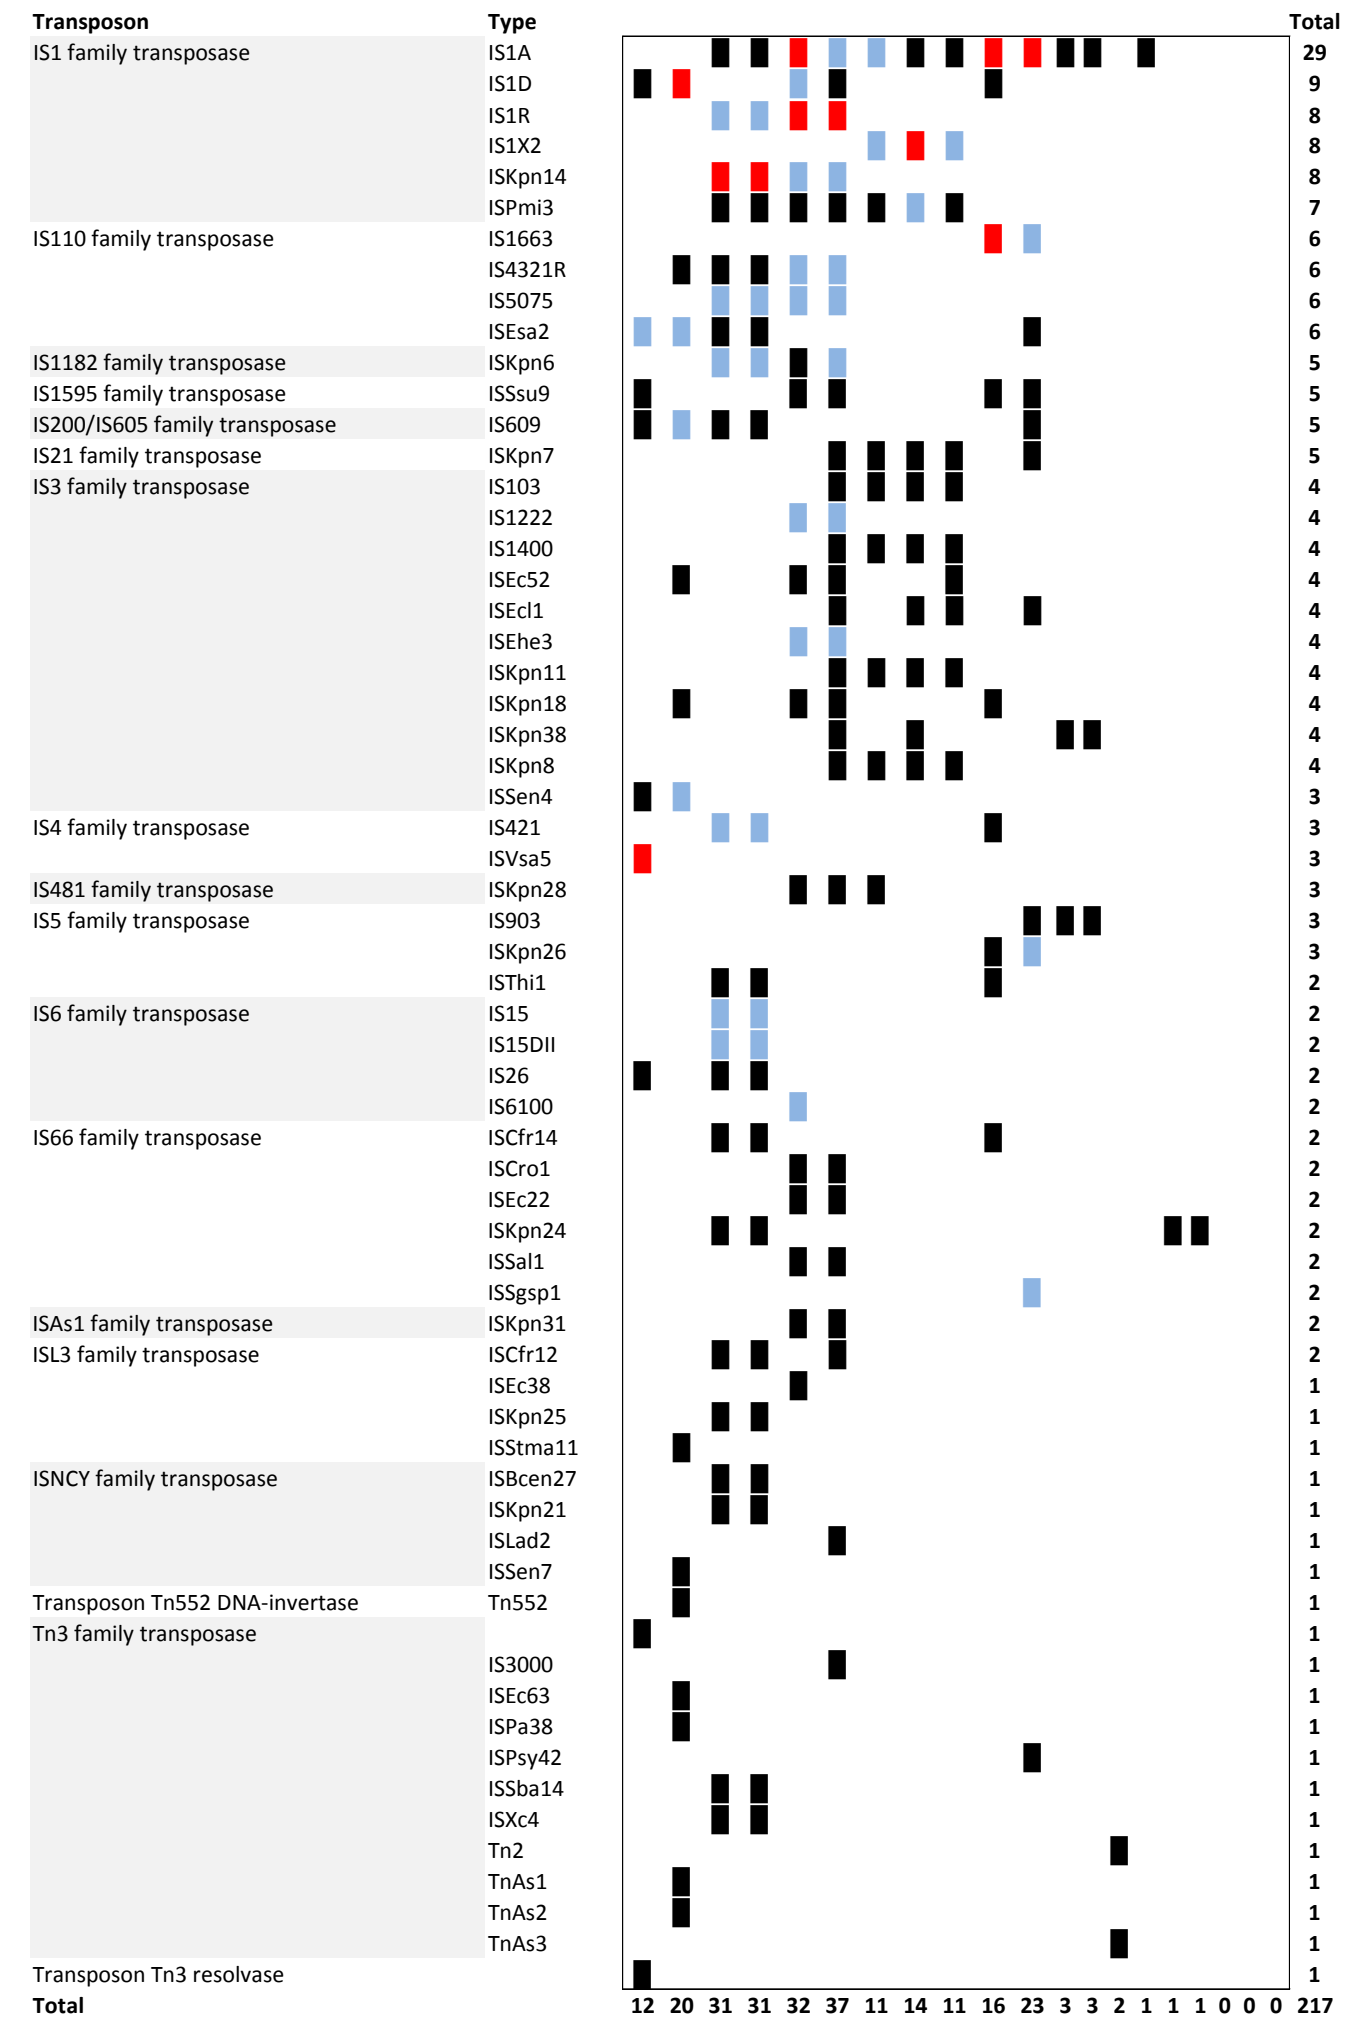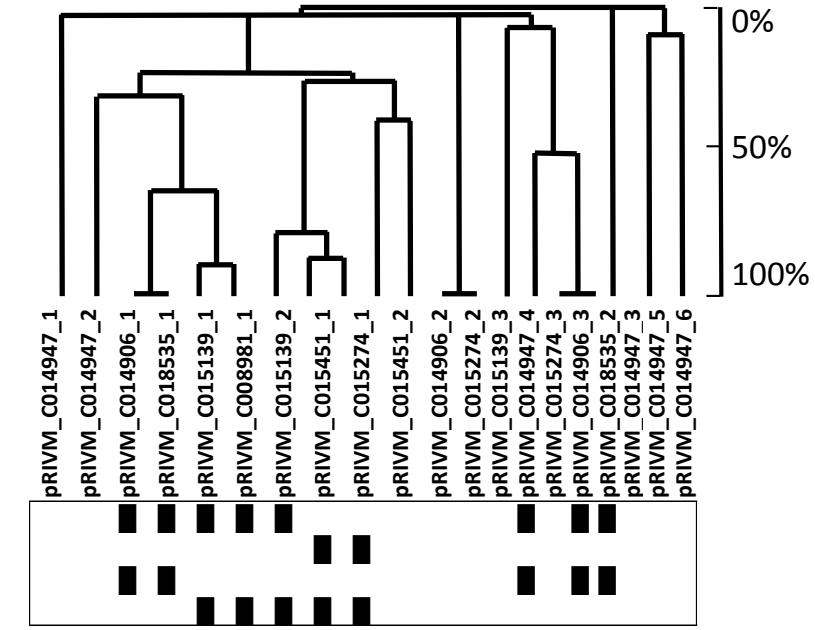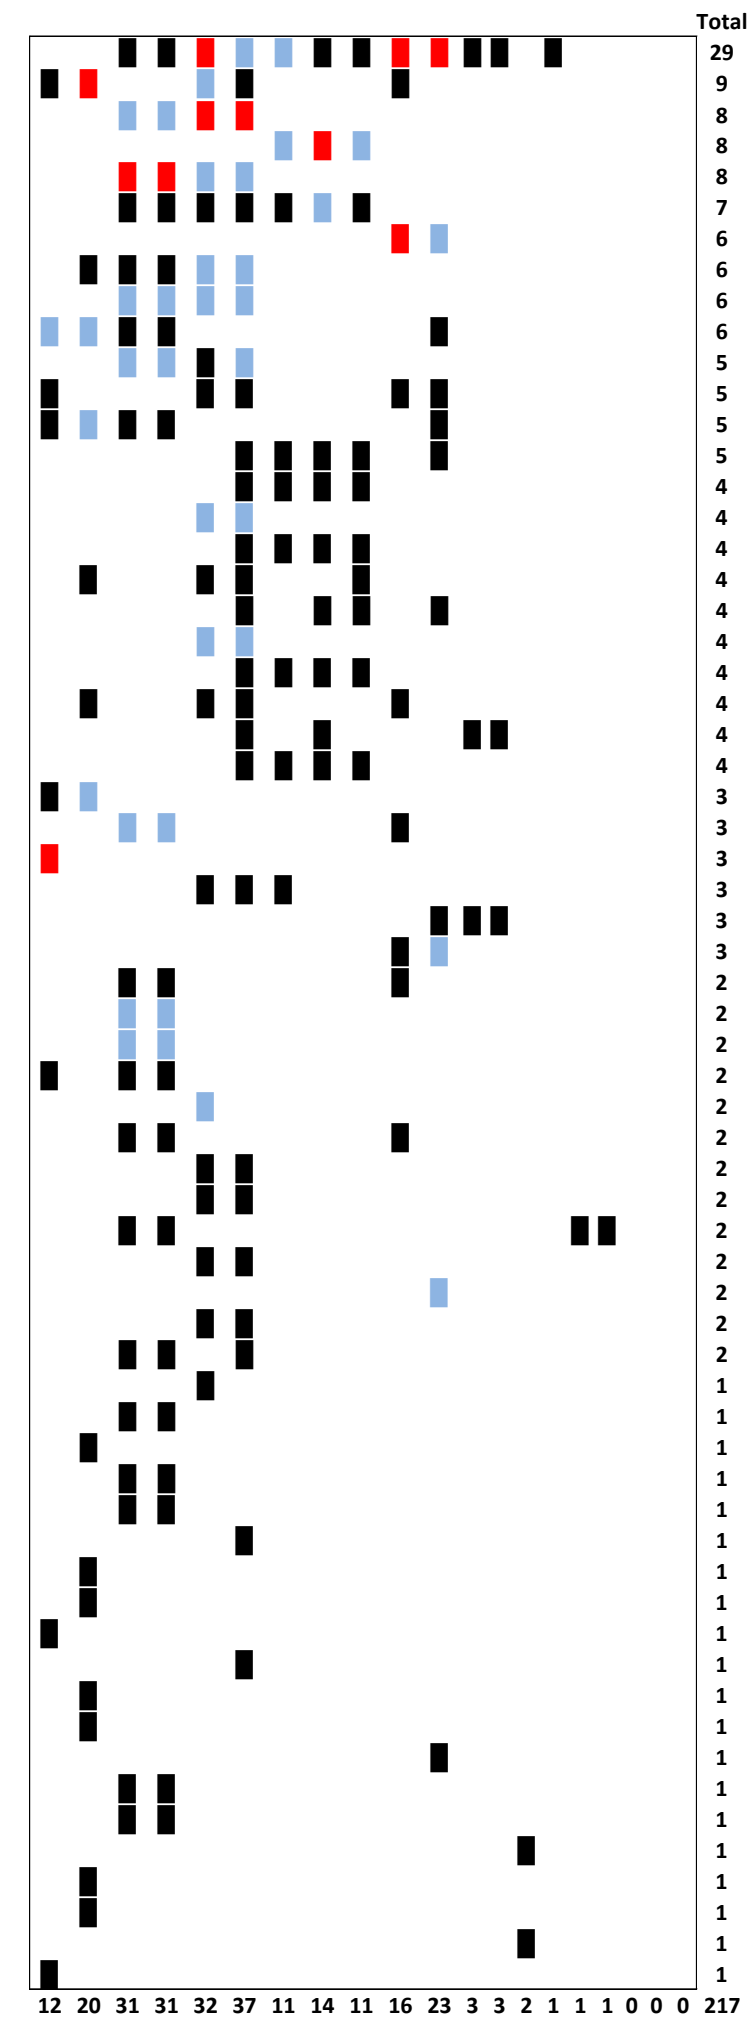

| <i>bla</i> <sub>KPC</sub> allele | KpnCluster                 | wgMLST<br>Cluster type | The Netherlands |    |    | Caribbean |   |   | Total |    |
|----------------------------------|----------------------------|------------------------|-----------------|----|----|-----------|---|---|-------|----|
|                                  |                            |                        | S               | I  | R  | S         | I | R |       |    |
| <i>bla</i> <sub>KPC-2</sub>      | KpnCluster-003             | 2521                   |                 |    | 2  |           |   |   | 2     |    |
|                                  | KpnCluster-005             | 123                    |                 |    | 3  |           |   |   | 3     |    |
|                                  | KpnCluster-019             | 2494                   | 1               | 2  |    | 6         | 4 |   | 13    |    |
|                                  | KpnCluster-021             | 2588                   |                 |    |    |           | 1 | 2 | 3     |    |
|                                  | KpnCluster-041             | 2494                   |                 |    |    | 2         |   |   | 2     |    |
|                                  | Non-KpnCluster<br>Subtotal | variant                |                 | 3  | 4  | 14        | 1 | 2 | 4     | 28 |
|                                  |                            |                        |                 |    |    |           |   |   |       | 51 |
| <i>bla</i> <sub>KPC-3</sub>      | KpnCluster-008             | 53                     |                 |    | 4  |           |   |   | 4     |    |
|                                  | KpnCluster-025             | 1257                   |                 | 1  | 6  |           |   |   | 7     |    |
|                                  | KpnCluster-038             | 1752                   |                 |    | 2  |           |   |   | 2     |    |
|                                  | KpnCluster-050             | 1969                   | 1               |    | 1  |           |   |   | 2     |    |
|                                  | Non-KpnCluster<br>Subtotal | variant                |                 | 3  | 5  | 8         | 1 |   | 1     | 18 |
|                                  |                            |                        |                 |    |    |           |   |   |       | 33 |
|                                  |                            |                        |                 |    |    |           |   |   |       | 84 |
| Total                            |                            |                        | 8               | 12 | 40 | 10        | 7 | 7 | 84    |    |

| Plasmid         | KpnCluster     | <i>bla</i> <sub>KPC</sub><br>allele | Bacterial species         | Plasmid                 | Query           |                 | Accession<br>number | Country     | Year | Reference                             |
|-----------------|----------------|-------------------------------------|---------------------------|-------------------------|-----------------|-----------------|---------------------|-------------|------|---------------------------------------|
|                 |                |                                     |                           |                         | Coverage<br>(%) | Identity<br>(%) |                     |             |      |                                       |
| pRIVM_C008981_1 | KpnCluster-003 | <i>bla</i> <sub>KPC-2</sub>         | <i>K. pneumoniae</i>      | pGMI16-005_01           | 35              | 99.96           | CP028181.1          | Denmark     | 2013 |                                       |
| pRIVM_C014906_1 | KpnCluster-019 | <i>bla</i> <sub>KPC-2</sub>         | <i>K. pneumoniae</i>      | pKPN1482-1              | 63              | 99.91           | CP020842.1          | USA         | 2014 | Long <i>et al.</i> , 2017             |
| pRIVM_C014906_2 |                |                                     | <i>K. quasipneumoniae</i> | plasmid pG747           | 97              | 99.84           | CP034137.1          | Nigeria     | 2013 |                                       |
| pRIVM_C014906_3 |                | <i>bla</i> <sub>KPC-2</sub>         | <i>K. pneumoniae</i>      | unnamed5                | 58              | 99.97           | CP033630.1          | Italy       | 2013 | Roe <i>et al.</i> , 2019              |
| pRIVM_C018535_1 | KpnCluster-019 | <i>bla</i> <sub>KPC-2</sub>         | <i>K. pneumoniae</i>      | pKPN1482-1<br>plasmid   | 63              | 99.91           | CP020842.1          | USA         | 2014 | Long <i>et al.</i> , 2017             |
| pRIVM_C018535_2 |                | <i>bla</i> <sub>KPC-2</sub>         | <i>K. pneumoniae</i>      | unnamed5                | 58              | 99.97           | CP033630.1          | Italy       | 2013 | Roe <i>et al.</i> , 2019              |
| pRIVM_C014947_1 | KpnCluster-021 | <i>bla</i> <sub>KPC-2</sub>         | <i>S. enterica</i>        | pSJO-60984              | 93              | 99.99           | CP025277.1          | USA         | 2007 |                                       |
| pRIVM_C014947_2 |                |                                     | <i>K. quasipneumoniae</i> | pDA33145-152<br>plasmid | 42              | 99.48           | CP029598.1          | USA         | 1994 | Nicoloff <i>et al.</i> , 2019         |
| pRIVM_C014947_3 |                |                                     | <i>K. pneumoniae</i>      | unnamed3                | 90              | 99.98           | CP032170.1          | USA         | 2015 |                                       |
| pRIVM_C014947_4 |                | <i>bla</i> <sub>KPC-2</sub>         | <i>K. pneumoniae</i>      | pA1705-KPC              | 93              | 99.97           | MH909348.1          | China       | 2013 |                                       |
| pRIVM_C014947_5 |                |                                     | <i>E. hormaechei</i>      | p34998-4.921kb          | 100             | 98.72           | CP010381.1          | USA         | 2011 | Chavda <i>et al.</i> , 2016           |
| pRIVM_C014947_6 |                |                                     | <i>E. hormaechei</i>      | unnamed4                | 100             | 92.18           | CP035389.1          | UK          | 2016 |                                       |
| pRIVM_C015139_1 | KpnCluster-005 |                                     | <i>K. pneumoniae</i>      | plasmid 2               | 100             | 99.99           | LR130549.1          | Australia   | 2018 |                                       |
| pRIVM_C015139_2 |                | <i>bla</i> <sub>KPC-2</sub>         | <i>K. pneumoniae</i>      | pUJ-83KPC               | 99              | 98.55           | MG700549.1          | Germany     | 2017 |                                       |
| pRIVM_C015139_3 |                |                                     | <i>K. pneumoniae</i>      | pBK13043-2              | 100             | 99.89           | CP020839.1          | USA         | 2004 | Long <i>et al.</i> , 2017             |
| pRIVM_C015274_1 | KpnCluster-008 | <i>bla</i> <sub>KPC-3</sub>         | <i>K. pneumoniae</i>      | plasmid p2              | 87              | 99.91           | CP019774.1          | Switzerland | 2015 | Ruppe <i>et al.</i> , 2017            |
| pRIVM_C015274_2 |                |                                     | <i>K. pneumoniae</i>      | pBK13043-2              | 100             | 99.95           | CP020839.1          | USA         | 2004 | Long <i>et al.</i> , 2017             |
| pRIVM_C015274_3 |                |                                     | <i>K. pneumoniae</i>      | ColEST258               | 100             | 100             | JN247853.1          | Italy       | 2012 | Garcia-Fernandez <i>et al.</i> , 2012 |
| pRIVM_C015451_1 | KpnCluster-025 | <i>bla</i> <sub>KPC-3</sub>         | <i>K. pneumoniae</i>      | pKPC                    | 99              | 99.99           | CP043971.1          | France      | 2019 |                                       |
| pRIVM_C015451_2 |                |                                     | <i>K. pneumoniae</i>      | p911021-tetA            | 66              | 99.55           | MG288679.1          | China       | 2019 |                                       |

| Plasmid(s)      | <i>bla</i> <sub>KPC</sub> allele | Phage region(s) length (kb) | Most Common Phage                                   | Accession number     |
|-----------------|----------------------------------|-----------------------------|-----------------------------------------------------|----------------------|
| pRIVM_C008981_1 | <i>bla</i> <sub>KPC-2</sub>      | 11.3                        | Escherichia phage RCS47                             | NC_042128            |
| pRIVM_C014906_1 | <i>bla</i> <sub>KPC-2</sub>      | 7, 3.2, 23.3, 5.1, 5.7      | Stx2-converting phage 1717                          | NC_011357            |
| pRIVM_C014906_2 |                                  | 43.6                        | Escherichia phage RCS47                             | NC_042128            |
| pRIVM_C014906_3 | <i>bla</i> <sub>KPC-2</sub>      |                             |                                                     |                      |
| pRIVM_C018535_1 | <i>bla</i> <sub>KPC-2</sub>      | 7, 3.2, 23.3, 5.1, 5.7      | Stx2-converting phage 1717                          | NC_011357            |
| pRIVM_C018535_2 | <i>bla</i> <sub>KPC-2</sub>      |                             |                                                     |                      |
| pRIVM_C014947_1 | <i>bla</i> <sub>KPC-2</sub>      | 10.9                        | Bacillus phage Shanette                             | NC_028983            |
| pRIVM_C014947_2 |                                  | 30.6, 15.1                  | Enterobacteria phage P1, Escherichia phage RCS47    | NC_005856, NC_042128 |
| pRIVM_C014947_3 |                                  |                             |                                                     |                      |
| pRIVM_C014947_4 |                                  |                             |                                                     |                      |
| pRIVM_C014947_5 |                                  |                             |                                                     |                      |
| pRIVM_C014947_6 |                                  |                             |                                                     |                      |
| pRIVM_C015139_1 | <i>bla</i> <sub>KPC-2</sub>      | 23.5, 11.3                  | Stx2-converting phage 1717, Escherichia phage RCS47 | NC_011357, NC_042128 |
| pRIVM_C015139_2 |                                  | 30.8                        | Escherichia phage RCS47                             | NC_042128            |
| pRIVM_C015139_3 |                                  | 24.8                        | Escherichia phage RCS47                             | NC_042128            |
| pRIVM_C015274_1 | <i>bla</i> <sub>KPC-3</sub>      | 38.7                        | Escherichia phage RCS47                             | NC_042128            |
| pRIVM_C015274_2 |                                  | 24.8                        | Escherichia phage RCS47                             | NC_042128            |
| pRIVM_C015274_3 |                                  |                             |                                                     |                      |
| pRIVM_C015451_1 | <i>bla</i> <sub>KPC-3</sub>      | 39.5                        | Escherichia phage RCS47                             | NC_042128            |
| pRIVM_C015451_2 |                                  | 20.6                        | Staphylococcus phage SPbeta-like                    | NC_029119            |
